## 21 **Abstract**

22           The viral capsid performs critical functions during HIV-1 infection and is a  
23 validated target for antiviral therapy. Previous studies have established that the proper  
24 structure and stability of the capsid are required for efficient HIV-1 reverse transcription  
25 in target cells. Moreover, it has recently been demonstrated that permeabilized virions  
26 and purified HIV-1 cores undergo efficient reverse transcription *in vitro* when the capsid  
27 is stabilized by addition of the host cell metabolite inositol hexakisphosphate (IP6).  
28 However, the molecular mechanism by which the capsid promotes reverse transcription  
29 is undefined. Here we show that wild type HIV-1 particles can undergo efficient reverse  
30 transcription *in vitro* in the absence of a membrane-permeabilizing agent. This activity,  
31 originally termed “natural endogenous reverse transcription” (NERT), depends on  
32 expression of the viral envelope glycoprotein during virus assembly and its incorporation  
33 into virions. Truncation of the gp41 cytoplasmic tail markedly reduced NERT activity,  
34 indicating that gp41 permits the entry of nucleotides into virions. Protease treatment of  
35 virions markedly reduced NERT suggesting the presence of a proteinaceous membrane  
36 channel. By contrast to reverse transcription in permeabilized virions, NERT required  
37 neither the addition of IP6 nor a mature capsid, indicating that an intact viral membrane  
38 can substitute for the function of the viral capsid during reverse transcription *in vitro*.  
39 Collectively, these results demonstrate that the viral capsid functions as a nanoscale  
40 container for reverse transcription during HIV-1 infection.

41

## 42 Introduction

43           The HIV-1 capsid is a conical shell composed of a single viral protein (CA)  
44 assembled as a lattice of approximately 1200 subunits (reviewed in (1)). The capsid  
45 surrounds the ribonucleoprotein complex (RNP) which consists of the viral genomic  
46 RNA, tRNA<sup>Lys</sup>, nucleocapsid protein (NC), reverse transcriptase (RT) and integrase (IN)  
47 enzymes. The capsid plays multiple roles during infection and is an emerging target for  
48 therapy (2, 3). The structure and stability of the capsid are critical for HIV-1 reverse  
49 transcription in target cells. Mutations that destabilize the capsid or perturb its structure  
50 result in impaired reverse transcription (4-10), as does targeting by restrictive variants of  
51 the host protein TRIM5 $\alpha$  (reviewed in (11)). By contrast, hyperstabilization of the capsid  
52 via mutations or antiviral compounds can inhibit nuclear entry without impairing reverse  
53 transcription, as can amino acid substitutions in CA that disrupt binding of host proteins  
54 to the capsid (12-14). Antiviral compounds targeting CA can also inhibit reverse  
55 transcription, nuclear entry, and integration, reflecting involvement of the capsid in these  
56 three early steps of infection (15-18).

57           The importance of capsid stability has also been underscored by studies of  
58 reverse transcription in purified HIV-1 cores or permeabilized virions *in vitro*. In the  
59 absence of a capsid-stabilizing agent, such endogenous reverse transcription (ERT)  
60 reactions with HIV-1 are inefficient, resulting in synthesis of full-length viral DNA in only  
61 a small fraction of viral cores. Addition of the host cell metabolite IP6 dramatically  
62 enhances the synthesis of late reverse transcription products (19, 20). ERT activity is  
63 correlated with capsid stabilization by IP6, further emphasizing the role of a stable  
64 capsid in reverse transcription (20). Addition of capsid-destabilizing antiviral

65 compounds inhibited the reaction, but this was partially overcome by increasing the  
66 concentration of IP6 (21). Although depletion of both IP6 and inositol pentakisphosphate  
67 (IP5) showed minimal effects on HIV-1 infection of target cells (22), it potentiated  
68 inhibition of infection by PF74 and the highly potent antiviral drug Lenacapavir (23),  
69 suggesting that target cell inositol phosphates help stabilize the capsid following entry of  
70 the viral core into target cells.

71         Despite the well-established link between HIV-1 capsid integrity and reverse  
72 transcription, the mechanism by which the capsid promotes completion of reverse  
73 transcription is unknown. Reverse transcriptase is a low processivity enzyme that  
74 dissociates after synthesis of short stretches of DNA (reviewed in (24)). Thus, a  
75 plausible hypothesis is that the capsid serves as a container for reactants and catalysts,  
76 ensuring that a sufficient local concentration of RT is maintained during the reaction (Fig  
77 1A). Additionally, the capsid could function as a molecular scaffold that serves to  
78 concentrate the reactants in a manner akin to surface catalysis of chemical reactions  
79 (Fig. 1B). While these two models are not mutually exclusive, the container model  
80 implies that the capsid must be sealed during the reaction, whereas a partially intact  
81 capsid could function as a scaffold. Here we report evidence resulting from the  
82 unexpected observation that intact HIV-1 particles can undergo efficient reverse  
83 transcription. We show that, by contrast to permeabilized virions or purified HIV-1  
84 cores, reverse transcription in nonpermeabilized virions occurs in the absence of a  
85 mature viral capsid, is insensitive to capsid-destabilizing mutations and compounds, and  
86 does not require the addition of IP6.

## 87 **Results**

### 88 **Capsid stabilization by IP6 results in DNA synthesis that is** 89 **resistant to added nuclease.**

90 Previous studies have indicated that stabilization of the viral capsid by  
91 nucleotides and/or IP6 promotes ERT activity *in vitro* (19, 20, 25, 26). In principle, the  
92 viral capsid could serve as a container for the reaction, a scaffold on which the reaction  
93 occurs, or both. The container hypothesis posits that the capsid is sealed and therefore  
94 should exclude molecules that exceed the size of the pores in the capsid lattice (i.e.,  
95 average-sized proteins). To test this, we performed ERT reactions in the presence and  
96 absence of DNase I and various concentrations of IP6 to result in graded levels of  
97 capsid stabilization. In the absence of DNase I, ERT was progressively enhanced by  
98 concentrations of IP6 of up to 10  $\mu$ M (Fig 2, reactions 1-5). As previously reported (19,  
99 20), the greatest increase was observed with synthesis of the late reverse transcripts.  
100 In parallel reactions containing DNase I, minimal effects were observed in reactions  
101 containing 1 and 10  $\mu$ M IP6, the concentration range in which the reaction was most  
102 efficient (Fig 2, reactions 6-9). As a control to determine whether capsid disassembly  
103 results in susceptibility of nascent DNA to degradation, we included reactions in which  
104 DNase I and the capsid-destabilizing compound PF74 were added after 4h and  
105 incubated for an additional 1h (Fig 2, reactions 10-12). In these reactions, the level of  
106 ERT was markedly reduced, indicating that capsid destabilization by PF74 rendered the  
107 reverse transcripts sensitive to degradation. These results indicated that IP6  
108 stabilization of the capsid is associated with protection of the reverse transcribed DNA

109 from nuclease degradation, suggesting that the capsid can sequester the DNA  
110 products. However, they did not exclude a possible scaffolding function for the capsid.

111

## 112 **Efficient reverse transcription can occur in nonpermeabilized** 113 **HIV-1 particles.**

114 In the course of this work, we unexpectedly observed that HIV-1 reverse  
115 transcription occurred in reactions lacking detergent (Triton X-100) and IP6 and was  
116 nearly as efficient as in reactions containing both components (Fig 3A). High quantities  
117 of both early (minus strand strong stop; MSS) and late (full length minus; FLM) products  
118 were produced in the reactions lacking detergent. As in reactions containing detergent  
119 and IP6, ERT reactions lacking detergent were inhibited by nucleoside and non-  
120 nucleoside reverse transcription inhibitors and by aldrithiol-2 (AT-2), a compound that  
121 inactivates the nucleocapsid protein by oxidizing zinc-coordinating Cys residues (27)  
122 (Fig 3B). However, by contrast to reactions containing detergent or purified cores, the  
123 reaction with nonpermeabilized virions was not inhibited by PF74. These observations  
124 suggested that wild type HIV-1 particles are naturally permeable to dNTPs and that the  
125 nonpermeabilized ERT reaction lacks the capsid stability requirement observed in  
126 reactions involving either permeabilized HIV-1 virions or purified cores.

127

## 128 **NERT is dependent on the viral Env glycoprotein complex.**

129 An earlier study linked the ability of nonpermeabilized virions to undergo reverse  
130 transcription *in vitro* to the viral Env protein gp41 (28). This activity was termed Natural  
131 Endogenous Reverse Transcription (NERT). To confirm the previous findings, we

132 performed NERT and ERT reactions containing wild type and Env-deficient particles  
133 and a series of Env truncation mutants lacking portions of the gp41 cytoplasmic tail  
134 (CT). As previously reported, Env-deficient particles were markedly impaired in NERT  
135 activity relative to wild type virions, with an approximately 50-fold reduction in synthesis  
136 of late products (Fig 4A). By contrast, the lack of Env had no effect on ERT. Truncation  
137 of 28 or 42 amino acids (CT28 and CT42, respectively) from the carboxyl terminus of  
138 gp41 only moderately reduce NERT activity relative to the level observed in wild type  
139 particles. However, removal of the C-terminal 93 amino acids (CT93) markedly reduced  
140 NERT, as did the more extensive truncations of 104 and 144 amino acids (CT104,  
141 CT144). Immunoblot analysis of pelleted virions showed that the five truncated Env  
142 proteins were incorporated into HIV-1 particles and that the mutants that exhibited  
143 impaired NERT activity contained at least as much gp41 protein as wild type particles  
144 (Fig 4, panels B and C). These results confirmed the earlier report that the cytoplasmic  
145 tail of gp41 plays a role in permeabilizing HIV-1 particles to dNTPs (28); further, they  
146 define a central region of the cytoplasmic tail as necessary for this activity.

147 We also asked whether Env proteins from other viruses can support NERT.  
148 Pseudotyped HIV-1 particles bearing the Env proteins of amphotropic murine leukemia  
149 virus (A-MLV) exhibited NERT activity approximately 22% that of particles bearing  
150 HIV-1 Env (Fig 5A). By contrast, HIV-1 particles bearing the vesicular stomatitis virus  
151 glycoprotein (VSV-G) exhibited only 5% of the activity of HIV-1 Env-bearing particles.  
152 Assays of particles released from 293T cells transfected with a full-length molecular  
153 clone of SIVmac293 also revealed that the virions were also active in NERT reactions  
154 and that the Env protein was required (Fig 5B). These results demonstrate that the

155 A-MLV and SIVmac239 Env glycoproteins, but not VSV-G, permit dNTP entry into  
156 nonpermeabilized virions, albeit with varying efficiencies. NERT activity was also  
157 exhibited by particles produced from several cloned HIV-1 primary isolate Env proteins,  
158 with efficiencies ranging from 27% to 119% of their corresponding ERT values (Fig 5C).

159

## 160 **NERT activity is exhibited by viruses produced in T cells.**

161 To determine whether NERT activity is limited to HIV-1 particles released from  
162 transfected 293T cells, we assayed NERT in wild type and Env- virions harvested from  
163 infected T cells. Five T cell lines (CEM, H9, Jurkat, MT-4, and SupT1) were inoculated  
164 with wild type and Env- particles that also bore the VSV-G protein to enhance initial  
165 infection. Cells were washed and cultured for 4 days, after which the supernatants were  
166 collected, treated with DNase I to remove potential contaminating plasmid DNA, and  
167 concentrated by pelleting through 20% sucrose to remove the nuclease. The resulting  
168 stocks were assayed in parallel for NERT and ERT activity. We observed high levels of  
169 NERT activity in the wild type virions released from CEM, Jurkat, and SupT1 cells (Fig  
170 6). Wild type particles released from H9 and MT-4 cells exhibited lower levels of NERT.  
171 Env-defective particles released from all five cell types exhibited minimal NERT relative  
172 to ERT activity. These results indicated that HIV-1 particles released from some human  
173 T cell lines are competent for NERT and that the activity is dependent on the Env  
174 protein.

175

## 176 **Minimally processed virions also exhibit NERT activity.**

177 Our standard procedure for producing virions involved transfection of cells, clarification  
178 of culture supernatants by low-speed centrifugation, filtration through a 0.45  $\mu\text{m}$  pore-



179 size syringe filter to remove organelles and large vesicles, digestion of remaining  
180 plasmid DNA by treatment with DNase I, pelleting by ultracentrifugation to concentrate  
181 the particles, and resuspension of the viral pellet by repeated pipetting. The extensive  
182 processing of the virions we employed left open the possibility that the dNTP membrane  
183 permeability induced by Env proteins could result from microdamage to the membrane  
184 induced during virion processing and storage.

185         To test whether physical damage of virions contributed to NERT activity, we  
186 performed reactions using virions that were minimally processed. Fresh culture  
187 supernatants were harvested from transfected cells and clarified by low-speed  
188 centrifugation without filtration. The virions were neither frozen, pelleted, nor otherwise  
189 concentrated. However, it was necessary to treat the virions with DNase I to reduce the  
190 residual carryover plasmid DNA from the transfections. Nonetheless, the nuclease was  
191 not removed prior to the reactions to minimize the possibility of damaging the  
192 membrane upon pelleting of the virions. NERT reactions were performed in the  
193 presence and absence of dNTPs to distinguish nascent from residual plasmid DNA.  
194 After a 4h incubation, reactions were halted by the addition of EDTA, and the virions  
195 were then pelleted by ultracentrifugation at 4°C through a 20% sucrose cushion. DNA  
196 was purified and early and late products quantified by qPCR; values were normalized by  
197 the levels exogenous RT activity present in each virus stock. DNA synthesis in NERT  
198 reactions with these minimally processed virions was comparable to that observed with  
199 virions prepared by our normal procedure (Fig 7A). As expected, unprocessed Env-  
200 deficient particles exhibited substantially lower levels of NERT activity. These results  
201 show that minimally processed HIV-1 particles also support efficient NERT, suggesting

202 that membrane damage during virion processing is an implausible explanation for  
203 efficient dNTP entry into virions.

204

## 205 **Protease treatment of HIV-1 particles reduces NERT activity.**

206 The ability of nonpermeabilized HIV-1 particles to undergo NERT suggested the  
207 presence of a membrane channel protein on HIV-1 particles that permits entry of  
208 dNTPs. To determine whether virion surface proteins render HIV-1 particles permeable  
209 to dNTPs, we assayed NERT in wild type virions following treatment with a nonspecific  
210 protease (proteinase K) to remove proteins from the virion surface. Treatment with  
211 active protease reduced late product synthesis in NERT reactions by more than 90%  
212 (Fig 7B). As a control for unexpected effects of protease treatment, we tested an  
213 identical concentration of proteinase K that had been heat inactivated. This treatment  
214 produced a negligible reduction of both ERT and NERT activity levels relative to the  
215 mock-treated control. Immunoblot analysis of the protease-treated particles showed a  
216 band profile reflecting cleavage of gp160 and gp41, with appearance of two faster-  
217 migrating bands detected with a monoclonal antibody against a membrane-proximal  
218 epitope in the gp41 CT (Fig 7C). We also noted a slight reduction in the intensity of  
219 bands corresponding to RT polypeptides following protease treatment of HIV-1  
220 particles. By contrast, the level of pelleted CA protein was not affected. These results  
221 indicate that cleavage of proteins from the surface of the virus reduces ERT activity,  
222 supporting the hypothesis that a protein-dependent membrane channel is required for  
223 NERT activity.

224 In principle, the observed reduction in NERT activity upon protease treatment of  
225 virions could result from cleavage of either a viral or a cellular protein on the virion

226 surface. To further probe the involvement of the gp41 CT in NERT activity, we  
227 examined two mutants encoding substitutions in the membrane-proximal region of the  
228 CT that result in protease cleavage of the tail (P203L and S205L; numbered according  
229 to the amino acid sequence of gp41). These viruses had been previously identified by  
230 selection for HIV-1 resistance to the cholesterol-binding compound amphotericin B  
231 methyl ester (AME) (29). Resistance to AME had been previously observed in CT  
232 truncation mutants (30), and acquisition of resistance via cleavage of the tail by the viral  
233 protease further supported the conclusion that AME sensitivity was conferred by the  
234 gp41 CT. We observed that NERT activity was markedly reduced in the P203L and  
235 S205L mutants, consistent with the requirement for the gp41 CT in NERT activity (Fig 8,  
236 panels A and B). Immunoblot analysis of the concentrated particles confirmed cleavage  
237 of a substantial portion of gp41 (Fig 8C). Thus, cleavage of the gp41 CT by the viral  
238 protease was associated with reduced NERT activity.

239

## 240 **NERT activity does not require the mature viral capsid.**

241 In a previous study, we showed that PF74 binds specifically and stably to purified  
242 HIV-1 particles (15), indicating that the compound can cross the viral membrane.  
243 Therefore, the observed independence of NERT on IP6 and resistance to the capsid-  
244 targeting inhibitor PF74 (Fig 3) suggested that NERT does not require a stable viral  
245 capsid, unlike ERT reactions in permeabilized virions and purified cores. To further test  
246 whether formation of the mature HIV-1 capsid is required for NERT activity, we  
247 performed reactions with particles that were arrested in maturation via amino acid  
248 substitutions that block cleavage of various sites in the Gag polyprotein by the viral

249 protease (PR). Because such mutations do not affect processing of the *pol* open  
250 reading frame by PR, both IN and RT are produced in normal quantities. We observed  
251 that mutations preventing Gag cleavage at the MA-CA and CA-SP1 junctions did not  
252 affect NERT activity but reduced ERT nearly to background levels (Fig 9A). By  
253 contrast, the MA/p6 mutant virus, containing cleavage-blocking substitutions at each of  
254 the Gag cleavage sites, exhibited moderately reduced NERT activity. Additionally,  
255 mutant particles with large in-frame deletions in the N-terminal domain of CA retained  
256 NERT activity but were markedly impaired in ERT reactions (Fig 9B). Collectively, these  
257 results show that efficient reverse transcription in intact HIV-1 particles does not require  
258 the mature HIV-1 capsid.

259

260

## 261 **Discussion**

262

263 In this study, we sought to define the mechanism by which the viral capsid  
264 promotes HIV-1 reverse transcription. Previous studies demonstrated a strong  
265 enhancement of ERT by IP6 and linked this effect to capsid stabilization by the  
266 metabolite. Here we provide two lines of evidence that IP6 stabilizes the closed form of  
267 the capsid and that this form is associated with efficient ERT. First, we showed that the  
268 IP6 enhancement of ERT is associated with acquisition of partial resistance to DNase I.  
269 ERT levels were enhanced by increasing IP6 concentrations, and the reaction products  
270 were largely refractory to degradation by the nuclease. The DNase I-resistance of the  
271 IP6-stimulated ERT products suggested that the reaction takes place within a sealed

272 container, but it did not exclude the additional possibility of a scaffolding role of the  
273 capsid.

274         The second line of evidence for the container model for capsid function was  
275 based on the fortuitous observation that the ERT reaction can occur within  
276 nonpermeabilized virions. Zhang and coworkers had reported in the mid 1990s that  
277 addition of dNPTs and polycations such as spermidine to HIV-1 particles resulted in  
278 detectable levels of DNA synthesis (31). They termed this reaction “NERT” for Natural  
279 Endogenous Reverse Transcription and proposed that this activity could promote sexual  
280 transmission of HIV-1. By contrast to the earlier study, our NERT reactions occurred  
281 efficiently in the absence of added polycations. Remarkably, unlike ERT, the NERT  
282 reaction did not require IP6, was resistant to PF74, and occurred in virions containing  
283 incompletely matured cores and in deletion mutants lacking the N-terminal domain of  
284 CA. We conclude that the NERT reaction is essentially independent of the viral capsid.  
285 Therefore, the intact viral membrane can serve as a container for the reverse  
286 transcription reaction in lieu of the mature capsid. The lack of a requirement for a  
287 mature capsid in the NERT reaction indicates that a scaffolding function of the capsid  
288 does not substantially contribute to efficient HIV-1 reverse transcription, at least *in vitro*.

289         If the HIV-1 capsid serves as a container for reverse transcription, what must be  
290 contained? One likely candidate is RT. Because the processivity of RT is relatively low,  
291 the local concentration of this enzyme in proximity to the viral genome may be critical.  
292 In preliminary studies, we have observed that addition of purified reverse transcriptase  
293 to ERT reactions lacking IP6 results in only a modest increase in late product synthesis.  
294 Based on the calculated volume of HIV-1 viral core (32), the reported proportion of Gag

295 and Gag-Pol proteins in virions, and assuming that approximately one half of the RT  
296 resides within the core, we estimate that the RT concentration within an average core is  
297 roughly 0.2 mM—far higher than that which we added to the reactions. Nonetheless,  
298 the ability of purified RT to saturate reactions containing high concentrations of artificial  
299 substrates suggested that it is not limiting and that components of the viral core must be  
300 retained. One plausible candidate is the nucleocapsid protein which plays critical roles  
301 in the primer placement and strand transfer steps of reverse transcription (33). ERT  
302 reactions may be useful for studying the role of NC proteins in HIV-1 reverse  
303 transcription in the context of the viral core.

304 We also confirmed the previous observation by Zhang and coworkers that NERT  
305 is dependent on the HIV-1 Env complex and that truncation of the gp41 CT reduces  
306 NERT activity. The mechanism by which the viral Env protein renders virions  
307 permeable to dNTPs remains to be determined. Protease shaving of intact HIV-1  
308 particles reduced NERT activity, and two HIV-1 mutants with full-length Env proteins  
309 bearing single amino acid substitutions in the gp41 CT resulting in its cleavage by the  
310 viral protease exhibited reduced NERT. A simple explanation for these results is that  
311 the Env protein complex itself, or a polypeptide derived from it (34), forms a pore in the  
312 viral membrane that permits passage of dNTPs and other small molecules. The gp41  
313 CT contains membrane-interacting domains termed lentivirus lytic peptides that are  
314 capable of disrupting membranes when added as synthetic peptides (35), suggesting  
315 that these regions of the trimeric Env protein complex may form structures that  
316 permeabilize the viral membrane. Although we cannot formally exclude the possible  
317 involvement of a virion-incorporated host cell protein in NERT, the reduced activity

318 observed in virions in which the CT is cleaved by the viral protease suggests otherwise.  
319 In any event, our results argue against nonspecific physical damage to the membrane  
320 that may occur during virion processing as a plausible explanation for virion permeability  
321 to dNTPs.

322         The ability of HIV-1 Env to render the viral membrane permeable to dNTPs  
323 suggests the possibility of a previously unrecognized role of the gp41 CT in HIV-1  
324 replication and/or pathogenesis. Lentiviral Env transmembrane proteins are typified by  
325 long CTs, and while the gp41 CT is known to have important trafficking and regulatory  
326 functions, these are apparently served by shorter sequences in other retroviral genera  
327 (36). Membrane permeabilization by Env may prime virions for reverse transcription  
328 prior to cell entry, thereby increasing the fraction of particles that complete the process  
329 following membrane fusion with target cells. Additionally, membrane permeabilization  
330 by Env on the cell surface may promote the release of small molecules from infected  
331 cells, potentially promoting inflammation and/or priming of neighboring cells for  
332 infection. Finally, deposition of Env on the surface of cells via virion fusion with the  
333 plasma membrane could render target cells permeable to extracellular dNTPs, thus  
334 promoting reverse transcription in resting T cells that contain low levels of nucleotides.

335         The NERT reaction may also have practical utility. HIV-1 particles contain low  
336 levels of Env, and rapid and sensitive assays to determine the susceptibility of variants  
337 in patients to neutralizing antibodies are needed to guide selection of the appropriate  
338 therapeutic antibodies for individuals (37). However, detection of functional HIV-1  
339 particles in patients may be confounded by the heterogeneity of Env levels on particles,  
340 which are typically low (38). The NERT reaction may provide a rapid and sensitive

341 approach to enrich for genomes from HIV-1 particles bearing functional Env proteins in  
342 patient samples containing both defective and infectious HIV-1 particles.

343

## 344 **Materials and Methods**

345

346 **Plasmids and viruses.** Wild type HIV-1 particles were produced by transfection of the  
347 full-length pNL4-3 molecular clone (39) or its corresponding mutants. CT truncation  
348 mutants and CA partial deletion mutants ( $\Delta$ 126-277 and  $\Delta$ 138-277) were generated by  
349 PCR overlap cloning and modeled after mutants characterized in a previous study (40).  
350 Mutant plasmids were verified by Sanger sequencing of the PCR-generated regions.  
351 The Gag cleavage mutants were previously described (41, 42). pNL4-3-based chimeric  
352 clones encoding primary isolate Env proteins were provided by Dr. Paul Bieniasz (43).  
353 The P203L and S205L CT mutants (29) were the generous gift of Dr. Eric Freed  
354 (National Cancer Institute). Plasmids pHCMV-G (44) and pSV-A-MLV-env (45),  
355 encoding VSV-G and A-MLV Env proteins, were obtained from Dr. Jane Burns and Dr.  
356 Nathaniel Landau, respectively. Plasmid pBR239E encoding full-length SIVmac239 was  
357 provided by Dr. Toshiaki Kodama. The *env*-defective mutant was constructed by end-  
358 filling of the HindIII site at nucleotide 7078, thus creating a frameshift in *env* at codon  
359 74.

360 Viruses were produced by transfection of 293T cells in 100 mm dishes using  
361 polyethyleneimine (PEI). DNA-PEI mixtures were added to cultures and incubated  
362 overnight. The culture medium was aspirated, monolayers gently rinsed with 5 ml of  
363 PBS, and 7 ml of fresh culture medium added. After 24h of further culture, the virus-



364 containing supernatants were harvested, clarified by passage through 0.45  $\mu$ M pore-  
365 size syringe filters, and frozen in 1 ml aliquots at  $-80^{\circ}\text{C}$ .

366 Experiments involving treatment of virions with proteinase K were performed as  
367 follows. Proteinase K was added to concentrated DNase I-treated virions to a final  
368 concentration of 0.1 mg/ml, incubated for 1h at  $37^{\circ}\text{C}$ , and the virions pelleted through  
369 20% sucrose to remove the protease. Virions were redissolved in their original volume  
370 and added to NERT reactions. Samples were also subjected to SDS-PAGE and  
371 immunoblotting.

372 For ERT and NERT reactions, aliquots of viruses were thawed in a  $37^{\circ}\text{C}$  water  
373 bath and  $\text{MgCl}_2$  and DNase I were added to 10 mM and 20  $\mu\text{g}/\text{ml}$  concentrations,  
374 respectively. Following incubation at  $37^{\circ}\text{C}$  for 1h, the particles were pelleted through a  
375 0.25 ml cushion of STE buffer (20 mM Tris-HCl pH 7.5, 150 mM NaCl, 1 mM EDTA)  
376 containing 20% sucrose by ultracentrifugation for 30 min at 45,000 rpm in a Beckman  
377 TLA-55 rotor. The supernatants were carefully removed by aspiration and the pellets  
378 resuspended in 50  $\mu\text{l}$  of STE buffer.

379

380 **Endogenous reverse transcription reactions.** Reactions were performed in 50  $\mu\text{l}$   
381 volumes containing 20 mM Tris-HCl pH 7.6, 2 mM  $\text{MgCl}_2$ , 150 mM NaCl, 1 mM DTT, 1  
382 mg/ml bovine serum albumin, 0.1 mM each dNTP, 0.1% (vol/vol) Triton X-100 (ERT)  
383 and the indicated concentrations of IP6 (TCI America). Reactions were initiated by the  
384 addition of virions and incubated at  $37^{\circ}\text{C}$  for either 4h or 14h. DNA was purified from  
385 the reactions using silica columns and assayed for early and late reverse transcripts by  
386 qPCR as previously described (20). The following compounds were tested:

387 azidothymidine triphosphate (AZTTP, Jena Bioscience); efavirenz (EFV, HRP cat. no  
388 4624); stavudine triphosphate (d4TTP, Jena Bioscience), PF-3450074 (PF74,  
389 MedChemExpress); aldrithiol (AT-2, Sigma).

390

391 **Immunoblotting.** Pelleted virions were dissolved in SDS-PAGE sample buffer and  
392 subjected to electrophoresis on precast 4-20% gradient gels using Tris-MOPS running  
393 buffer (Genscript). Proteins were transferred to Protran nitrocellulose membranes  
394 (Perkin-Elmer) with a Genie electroblotter (Idea Scientific). Blots were blocked for 1h  
395 with 5% nonfat dry milk dissolved in PBS and probed with 1  $\mu\text{g/ml}$  anti-gp41 monoclonal  
396 antibody (Chessie 8) produced in-house from the corresponding hybridoma. Proteins  
397 were detected with a IR680 dye-conjugated anti-mouse secondary antibody. Bands  
398 were revealed by scanning the blot with a LI-COR Odyssey imager and quantified with  
399 the instrument software. Following reprobing with an anti-CA monoclonal antibody  
400 (produced from hybridoma186-H12-5C), the relative ratios of gp41 to CA were  
401 calculated from the quantified band intensities.

## 402 **Figure legends**

### 403 **Fig 1. Hypothetical models for the role of the HIV-1 capsid in reverse**

404 **transcription.** A. The container model posits that the capsid serves to maintain the  
405 concentrations of proteins and nucleic acids required for reverse transcription and  
406 predicts that the capsid must remain fully intact during the reaction. B. In the scaffold  
407 model, the inner face of the assembled capsid functions as a platform on which the  
408 reaction takes place, suggesting that the capsid may be semi-intact.

409

### 410 **Fig 2. IP6-dependent ERT reactions are resistant to degradation by DNase I.** ERT

411 reactions were performed with HIV-1 particles in the presence of the indicated  
412 concentrations of IP6, with or without added DNase I. Reactions were incubated for 4h.  
413 In reactions 10-12, PF74 was added to a concentration of 20  $\mu$ M and DNase I to 20  
414  $\mu$ g/ml, and the reactions were incubated for an additional 60 min. Products were purified  
415 and quantified by qPCR using primers specific for minus strand strong stop (MSS) and  
416 full length minus strand (FLM) amplicons. Results shown are representative of two  
417 independent experiments.

418

### 419 **Fig 3. Reverse transcription in nonpermeabilized HIV-1 particles does not require**

420 **addition of IP6 and is resistant to PF74.** Reactions were incubated for 14h. A.  
421 Reactions with wild type HIV-1 particles were performed in the presence or absence of  
422 dNTPs (dATP, dCTP, dGTP, and TTP; 0.1 mM each), 0.1% Triton X-100, and 0.1 mM  
423 IP6. B. Reactions were performed in the absence or presence of detergent and IP6  
424 (NERT and ERT, respectively) with the indicated inhibitors: 10  $\mu$ M azidothymidine

425 triphosphate (AZTTP); 1  $\mu$ M efavirenz (EFV); 10  $\mu$ M stavudine triphosphate (d4TTP); 1  
426 mM aldrithiol (AT-2); 10  $\mu$ M PF-3450074 (PF74). The reaction designated “complete”  
427 contained dNTPs but no inhibitor. Results shown are representative of two independent  
428 experiments.

429

430 **Fig 4. Reverse transcription in nonpermeabilized HIV-1 particles requires the gp41**

431 **CT.** A. Reactions containing wild type (WT), Env-deficient (Env<sup>-</sup>), and the indicated  
432 gp41 C-terminal truncation mutants were performed in the absence (NERT) and  
433 presence (ERT) of detergent and IP6. Reactions were incubated for 14h and the early  
434 (MSS) and late (FLM) products quantified by qPCR. Numerical values in the graph  
435 represent the NERT to ERT ratio of FLM product levels in each reaction relative to that  
436 measured for wild type virions. B. Pelleted virions used in the reactions shown in A were  
437 analyzed by immunoblotting using a monoclonal antibody recognizing a membrane-  
438 proximal epitope in the gp41 CT. C. Ratio of band intensities of gp41 and CA shown in  
439 B. Error bars represent the range of values from two independent experiments. Results  
440 shown in each panel are representative of two independent experiments.

441

442 **Fig 5. NERT activity depends on the viral Env protein.** NERT and ERT reactions  
443 were performed with the indicated viruses. A. Analysis of wild type HIV-1 particles (HIV-  
444 1), A-MLV pseudotyped HIV-1 particles (A-MLV), and VSV-G-pseudotyped HIV-1  
445 particles (VSV). B. Analysis of wild type and Env<sup>-</sup> SIV<sub>mac</sub>239 particles. C. Analysis of  
446 wild type (NL4-3), Env<sup>-</sup>, and NL4-3 chimerae encoding Env proteins from HIV-1 primary

447 isolates. Shown are the levels of late product synthesis detected in each NERT and  
448 ERT reaction. Results are representative of two independent experiments.

449

450 **Fig 6. NERT efficiency in HIV-1 particles varies with the cellular source of the**  
451 **virions.** Wild type and Env- HIV-1 particles were harvested from the indicated T cell  
452 lines, concentrated, and assayed for NERT and ERT activity. Shown are the levels of  
453 early (MSS) and late (FLM) products. The numerical values above each sample  
454 represent the ratio of late product levels in the corresponding NERT and ERT reactions.  
455 Results shown are representative of two independent experiments.

456

457 **Fig 7. Treatment of intact HIV-1 particles with protease reduces NERT activity.** A.  
458 NERT reactions in minimally processed wild type (WT) and Env- particles. Shown are  
459 the levels of early and late product synthesis in reactions containing and lacking dNTPs.  
460 B. NERT activity in concentrated virions after treatment for 1h with proteinase K (Prot K)  
461 or heat-inactivated proteinase K (H.I. Prot K). Reactions containing virions that were  
462 not incubated (None) and virions incubated with no proteinase K (Mock) served as  
463 controls. C. Immunoblot analysis of virions used in the reactions shown in B. The blot  
464 was probed with an antibody to the gp41 CT and with HIV-Ig, which recognizes RT, IN,  
465 and CA. Results shown are from one of two independent experiments.

466

467 **Fig 8. HIV-1 particles with cleavable gp41 CT proteins exhibit reduced NERT**  
468 **activity.** A. Reactions were performed with the indicated wild type, Env-, and CT point  
469 mutant virions. Shown are the early (MSS and FST) and late (FLM and SST) products

470 from the corresponding NERT and ERT reactions. B. Ratios of the DNA levels detected  
471 in the NERT and ERT reactions shown in A. C. Immunoblot analysis of the concentrated  
472 particles used in this experiment. Results shown are from one of two independent  
473 experiments.

474

475 **Fig 9. NERT activity occurs in particles lacking a mature capsid.** A. NERT and  
476 ERT assays of the indicated wild type (NL4-3) and Gag cleavage mutants. CA5  
477 particles contain uncleaved CA-SP1 protein; CA6 particles contain uncleaved CA-SP1-  
478 NC; MA-CA contains uncleaved MA-CA protein; MA-p2: uncleaved MA-CA-SP1; MA-  
479 NC: uncleaved MA-CA-SP1-NC; and MA-p6: uncleaved MA-CA-SP1-NC-SP1-p6.  
480 Shown are the early and late product DNA levels (FST and FLM, respectively). B. HIV-1  
481 mutants bearing large deletions in CA are competent for NERT. Two mutants lacking  
482 nearly the entire N-terminal domain of CA were assayed for NERT and ERT with wild  
483 type and Env- particles. Numerical values shown represent the relative efficiency of  
484 ERT (FLM products normalized by exogenous RT activity levels in the viruses). The  
485 results shown are from one of two independent experiments.

## 486 **Acknowledgments**

487 We thank the members of the Aiken lab for helpful suggestions during the course of this  
488 work. The following reagents were obtained through the NIH HIV Reagent Program,  
489 Division of AIDS, NIAID, NIH: Human Immunodeficiency Virus 1 (HIV-1), strain NL4-3  
490 Infectious Molecular Clone (pNL4-3), ARP-114, contributed by Dr. M. Martin; anti-  
491 Human Immunodeficiency Virus 1 (HIV-1) gp120 Hybridoma (Chessie 8), ARP-526,  
492 contributed by Dr. George K. Lewis; anti-Human Immunodeficiency Virus 1 (HIV-1) p24  
493 Hybridoma (183-H12-5C), ARP-1513, contributed by Dr. Bruce Chesebro and Dr. Hardy  
494 Chen. Supported by NIH grant R01 AI157843. AVR was supported by a CFAR  
495 Diversity, Equity, and Inclusion Pathway Initiative (CDEIPI) supplement to  
496 P30AI036219.

## 497 **References**

- 498 1. Campbell EM, Hope TJ. 2015. HIV-1 capsid: the multifaceted key player in HIV-1  
499 infection. *Nat Rev Microbiol* 13:471-83.
- 500 2. Zila V, Muller TG, Muller B, Krausslich HG. 2021. HIV-1 capsid is the key orchestrator of  
501 early viral replication. *PLoS Pathog* 17:e1010109.
- 502 3. Tailor MW, Chahine EB, Koren D, Sherman EM. 2023. Lenacapavir: A Novel Long-Acting  
503 Capsid Inhibitor for HIV. *Ann Pharmacother*  
504 doi:10.1177/10600280231171375:10600280231171375.
- 505 4. Forshey BM, von Schwedler U, Sundquist WI, Aiken C. 2002. Formation of a human  
506 immunodeficiency virus type 1 core of optimal stability is crucial for viral replication. *J*  
507 *Viro* 76:5667-77.
- 508 5. Tang S, Murakami T, Agresta BE, Campbell S, Freed EO, Levin JG. 2001. Human  
509 immunodeficiency virus type 1 N-terminal capsid mutants that exhibit aberrant core  
510 morphology and are blocked in initiation of reverse transcription in infected cells. *J Viro*  
511 75:9357-66.
- 512 6. Yufenyuy EL, Aiken C. 2013. The NTD-CTD intersubunit interface plays a critical role in  
513 assembly and stabilization of the HIV-1 capsid. *Retrovirology* 10:29.
- 514 7. Reicin AS, Ohagen A, Yin L, Hoglund S, Goff SP. 1996. The role of Gag in human  
515 immunodeficiency virus type 1 virion morphogenesis and early steps of the viral life  
516 cycle. *J Viro* 70:8645-52.
- 517
- 518

- 519 8. Dorfman T, Bukovsky A, Ohagen A, Hoglund S, Gottlinger HG. 1994. Functional domains  
520 of the capsid protein of human immunodeficiency virus type 1. *J Virol* 68:8180-7.
- 521 9. Wang CT, Barklis E. 1993. Assembly, processing, and infectivity of human  
522 immunodeficiency virus type 1 gag mutants. *J Virol* 67:4264-4273.
- 523 10. Furuta RA, Shimano R, Ogasawara T, Inubushi R, Amano K, Akari H, Hatanaka M,  
524 Kawamura M, Adachi A. 1997. HIV-1 capsid mutants inhibit the replication of wild-type  
525 virus at both early and late infection phases. *FEBS Lett* 415:231-4.
- 526 11. Ganser-Pornillos BK, Pornillos O. 2019. Restriction of HIV-1 and other retroviruses by  
527 TRIM5. *Nat Rev Microbiol* 17:546-556.
- 528 12. Dismuke DJ, Aiken C. 2006. Evidence for a functional link between uncoating of the  
529 human immunodeficiency virus type 1 core and nuclear import of the viral  
530 preintegration complex. *J Virol* 80:3712-20.
- 531 13. Yang R, Shi J, Byeon IJ, Ahn J, Sheehan JH, Meiler J, Gronenborn AM, Aiken C. 2012.  
532 Second-site suppressors of HIV-1 capsid mutations: restoration of intracellular activities  
533 without correction of intrinsic capsid stability defects. *Retrovirology* 9:30.
- 534 14. Matreyek KA, Yucel SS, Li X, Engelman A. 2013. Nucleoporin NUP153 phenylalanine-  
535 glycine motifs engage a common binding pocket within the HIV-1 capsid protein to  
536 mediate lentiviral infectivity. *PLoS Pathog* 9:e1003693.
- 537 15. Shi J, Zhou J, Shah VB, Aiken C, Whitby K. 2011. Small-molecule inhibition of human  
538 immunodeficiency virus type 1 infection by virus capsid destabilization. *J Virol* 85:542-9.
- 539 16. Saito A, Ferhadian D, Sowd GA, Serrao E, Shi J, Halambage UD, Teng S, Soto J, Siddiqui  
540 MA, Engelman AN, Aiken C, Yamashita M. 2016. Roles of Capsid-Interacting Host Factors  
541 in Multimodal Inhibition of HIV-1 by PF74. *J Virol* 90:5808-5823.
- 542 17. Price AJ, Jacques DA, McEwan WA, Fletcher AJ, Essig S, Chin JW, Halambage UD, Aiken C,  
543 James LC. 2014. Host cofactors and pharmacologic ligands share an essential interface in  
544 HIV-1 capsid that is lost upon disassembly. *PLoS Pathog* 10:e1004459.
- 545 18. Balasubramaniam M, Zhou J, Addai A, Martinez P, Pandhare J, Aiken C, Dash C. 2019.  
546 PF74 Inhibits HIV-1 Integration by Altering the Composition of the Preintegration  
547 Complex. *J Virol* 93.
- 548 19. Christensen DE, Ganser-Pornillos BK, Johnson JS, Pornillos O, Sundquist WI. 2020.  
549 Reconstitution and visualization of HIV-1 capsid-dependent replication and integration  
550 in vitro. *Science* 370:eabc8420.
- 551 20. Jennings J, Shi J, Varadarajan J, Jamieson PJ, Aiken C. 2020. The Host Cell Metabolite  
552 Inositol Hexakisphosphate Promotes Efficient Endogenous HIV-1 Reverse Transcription  
553 by Stabilizing the Viral Capsid. *mBio* 11:e02820-20.
- 554 21. Sowd GA, Shi J, Fulmer A, Aiken C. 2023. HIV-1 capsid stability enables inositol  
555 phosphate-independent infection of target cells and promotes integration into genes.  
556 *PLoS Pathog* 19:e1011423.
- 557 22. Mallery DL, Faysal KMR, Kleinpeter A, Wilson MSC, Vaysburd M, Fletcher AJ, Novikova  
558 M, Bocking T, Freed EO, Saiardi A, James LC. 2019. Cellular IP6 Levels Limit HIV  
559 Production while Viruses that Cannot Efficiently Package IP6 Are Attenuated for  
560 Infection and Replication. *Cell Rep* 29:3983-3996 e4.
- 561 23. Sowd GA, Shi J, Aiken C. 2021. HIV-1 CA Inhibitors Are Antagonized by Inositol  
562 Phosphate Stabilization of the Viral Capsid in Cells. *J Virol* 95:e0144521.



- 563 24. Hu WS, Hughes SH. 2012. HIV-1 reverse transcription. *Cold Spring Harb Perspect Med* 2.  
564 25. Jacques DA, McEwan WA, Hilditch L, Price AJ, Towers GJ, James LC. 2016. HIV-1 uses  
565 dynamic capsid pores to import nucleotides and fuel encapsidated DNA synthesis.  
566 *Nature* 536:349-53.
- 567 26. Mallery DL, Marquez CL, McEwan WA, Dickson CF, Jacques DA, Anandapadamanaban M,  
568 Bichel K, Towers GJ, Saiardi A, Bocking T, James LC. 2018. IP6 is an HIV pocket factor that  
569 prevents capsid collapse and promotes DNA synthesis. *Elife* 7:e35335.
- 570 27. Rossio JL, Esser MT, Suryanarayana K, Schneider DK, Bess JW, Jr., Vasquez GM, Wiltrout  
571 TA, Chertova E, Grimes MK, Sattentau Q, Arthur LO, Henderson LE, Lifson JD. 1998.  
572 Inactivation of human immunodeficiency virus type 1 infectivity with preservation of  
573 conformational and functional integrity of virion surface proteins. *J Virol* 72:7992-8001.
- 574 28. Zhang H, Dornadula G, Alur P, Laughlin MA, Pomerantz RJ. 1996. Amphipathic domains  
575 in the C terminus of the transmembrane protein (gp41) permeabilize HIV-1 virions: a  
576 molecular mechanism underlying natural endogenous reverse transcription. *Proc Natl  
577 Acad Sci U S A* 93:12519-24.
- 578 29. Waheed AA, Ablan SD, Roser JD, Sowder RC, Schaffner CP, Chertova E, Freed EO. 2007.  
579 HIV-1 escape from the entry-inhibiting effects of a cholesterol-binding compound via  
580 cleavage of gp41 by the viral protease. *Proc Natl Acad Sci U S A* 104:8467-71.
- 581 30. Waheed AA, Ablan SD, Mankowski MK, Cummins JE, Ptak RG, Schaffner CP, Freed EO.  
582 2006. Inhibition of HIV-1 replication by amphotericin B methyl ester: selection for  
583 resistant variants. *J Biol Chem* 281:28699-711.
- 584 31. Zhang H, Dornadula G, Pomerantz RJ. 1996. Endogenous reverse transcription of human  
585 immunodeficiency virus type 1 in physiological microenvironments: an important stage  
586 for viral infection of nondividing cells. *J Virol* 70:2809-24.
- 587 32. Bryer AJ, Hadden-Perilla JA, Stone JE, Perilla JR. 2019. High-Performance Analysis of  
588 Biomolecular Containers to Measure Small-Molecule Transport, Transbilayer Lipid  
589 Diffusion, and Protein Cavities. *J Chem Inf Model* 59:4328-4338.
- 590 33. Rene B, Mauffret O, Fosse P. 2018. Retroviral nucleocapsid proteins and DNA strand  
591 transfers. *Biochim Open* 7:10-25.
- 592 34. Pfeiffer T, Ruppert T, Schaal H, Bosch V. 2013. Detection and initial characterization of  
593 protein entities consisting of the HIV glycoprotein cytoplasmic C-terminal domain alone.  
594 *Virology* 441:85-94.
- 595 35. Costin JM, Rausch JM, Garry RF, Wimley WC. 2007. Viroporin potential of the lentivirus  
596 lytic peptide (LLP) domains of the HIV-1 gp41 protein. *Viol J* 4:123.
- 597 36. Tedbury PR, Freed EO. 2015. The cytoplasmic tail of retroviral envelope glycoproteins.  
598 *Prog Mol Biol Transl Sci* 129:253-84.
- 599 37. Sneller MC, Blazkova J, Justement JS, Shi V, Kennedy BD, Gittens K, Tolstenko J,  
600 McCormack G, Whitehead EJ, Schneck RF, Proschan MA, Benko E, Kovacs C, Oguz C,  
601 Seaman MS, Caskey M, Nussenzweig MC, Fauci AS, Moir S, Chun TW. 2022. Combination  
602 anti-HIV antibodies provide sustained virological suppression. *Nature* 606:375-381.
- 603 38. Zhu P, Chertova E, Bess J, Jr., Lifson JD, Arthur LO, Liu J, Taylor KA, Roux KH. 2003.  
604 Electron tomography analysis of envelope glycoprotein trimers on HIV and simian  
605 immunodeficiency virus virions. *Proc Natl Acad Sci U S A* 100:15812-7.

- 606 39. Adachi A, Gendelman HE, Koenig S, Folks T, Willey R, Rabson A, Martin MA. 1986.  
607 Production of acquired immunodeficiency syndrome-associated retrovirus in human and  
608 nonhuman cells transfected with an infectious molecular clone. *J Virol* 59:284-91.
- 609 40. Borsetti A, Ohagen A, Gottlinger HG. 1998. The C-terminal half of the human  
610 immunodeficiency virus type 1 Gag precursor is sufficient for efficient particle assembly.  
611 *J Virol* 72:9313-7.
- 612 41. Wiegers K, Rutter G, Kottler H, Tessmer U, Hohenberg H, Krausslich H-G. 1998.  
613 Sequential steps in human immunodeficiency virus particle maturation revealed by  
614 alterations of individual Gag polyprotein cleavage sites. *J Virol* 72:2846-2854.
- 615 42. Wyma DJ, Jiang J, Shi J, Zhou J, Lineberger JE, Miller MD, Aiken C. 2004. Coupling of  
616 human immunodeficiency virus type 1 fusion to virion maturation: a novel role of the  
617 gp41 cytoplasmic tail. *J Virol* 78:3429-35.
- 618 43. Zhang YJ, Hatzioannou T, Zang T, Braaten D, Luban J, Goff SP, Bieniasz PD. 2002.  
619 Envelope-dependent, cyclophilin-independent effects of glycosaminoglycans on human  
620 immunodeficiency virus type 1 attachment and infection. *J Virol* 76:6332-43.
- 621 44. Yee JK, Friedmann T, Burns JC. 1994. Generation of high-titer pseudotyped retroviral  
622 with very broad host range. *Methods Cell Biol* 43:99-112.
- 623 45. Landau NR, Page KA, Littman DR. 1991. Pseudotyping with human T-cell leukemia virus  
624 type I broadens the human immunodeficiency virus host range. *J Virol* 65:162-169.  
625

## A. Container Model

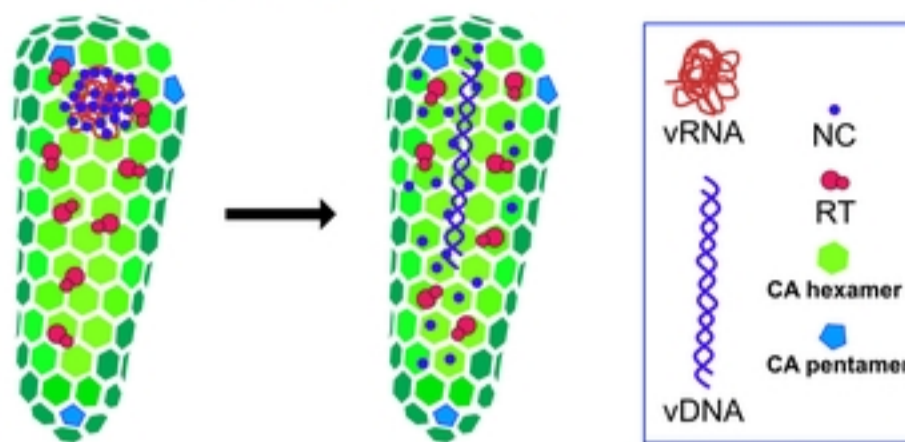

## B. Scaffold Model

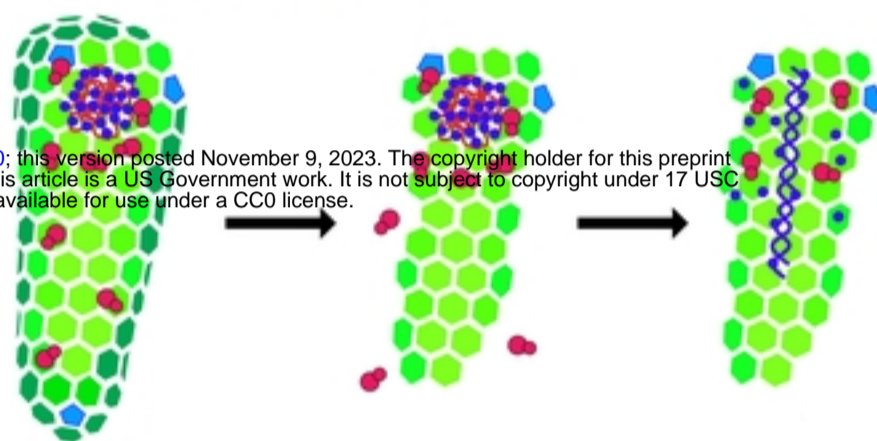

bioRxiv preprint doi: <https://doi.org/10.1101/2023.11.08.566350>; this version posted November 9, 2023. The copyright holder for this preprint (which was not certified by peer review) is the author/funder. This article is a US Government work. It is not subject to copyright under 17 USC 105 and is also made available for use under a CC0 license.

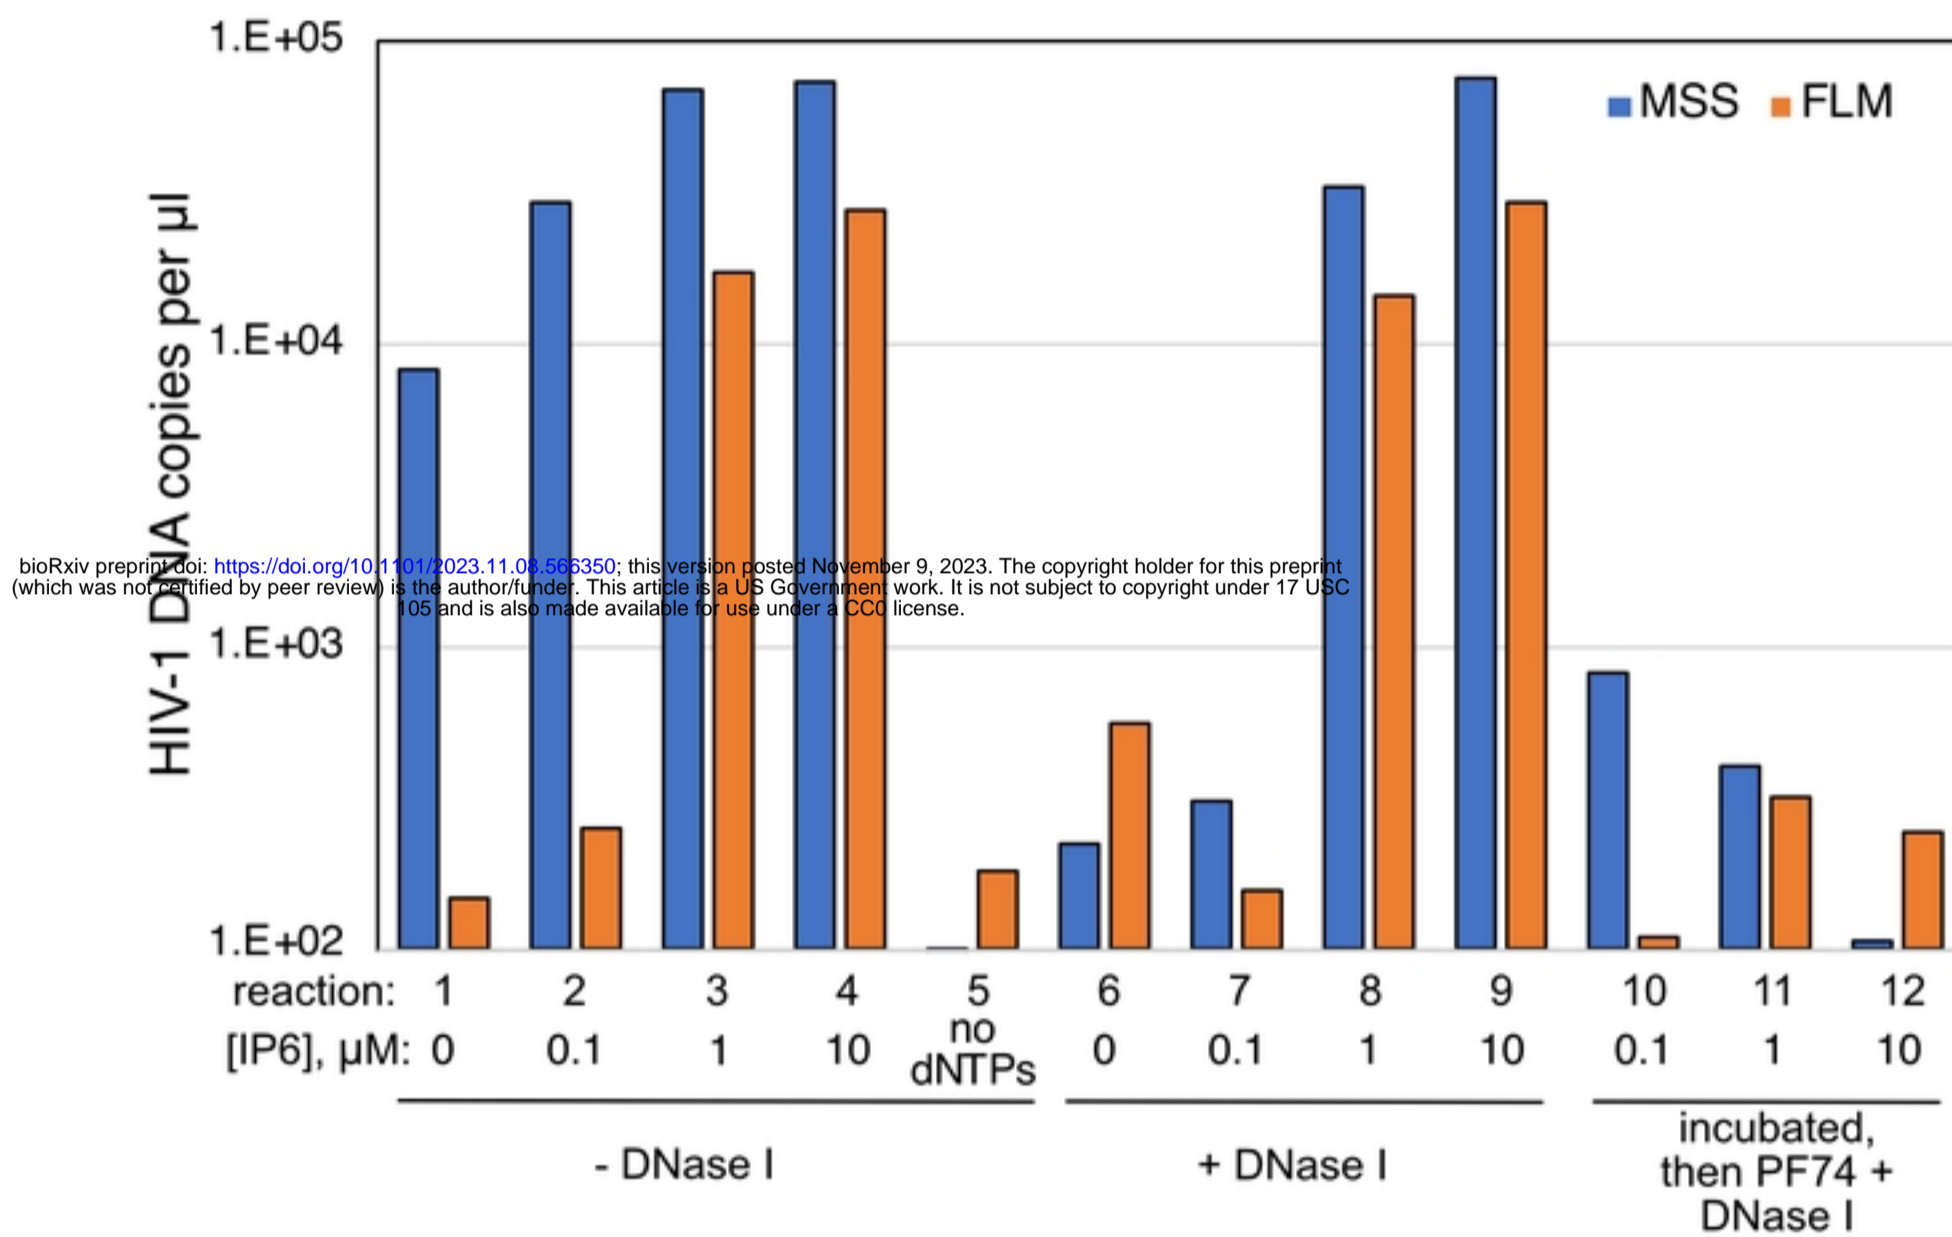

bioRxiv preprint doi: <https://doi.org/10.1101/2023.11.09.566350>; this version posted November 9, 2023. The copyright holder for this preprint (which was not certified by peer review) is the author/funder. This article is a US Government work. It is not subject to copyright under 17 USC 105 and is also made available for use under a CC0 license.

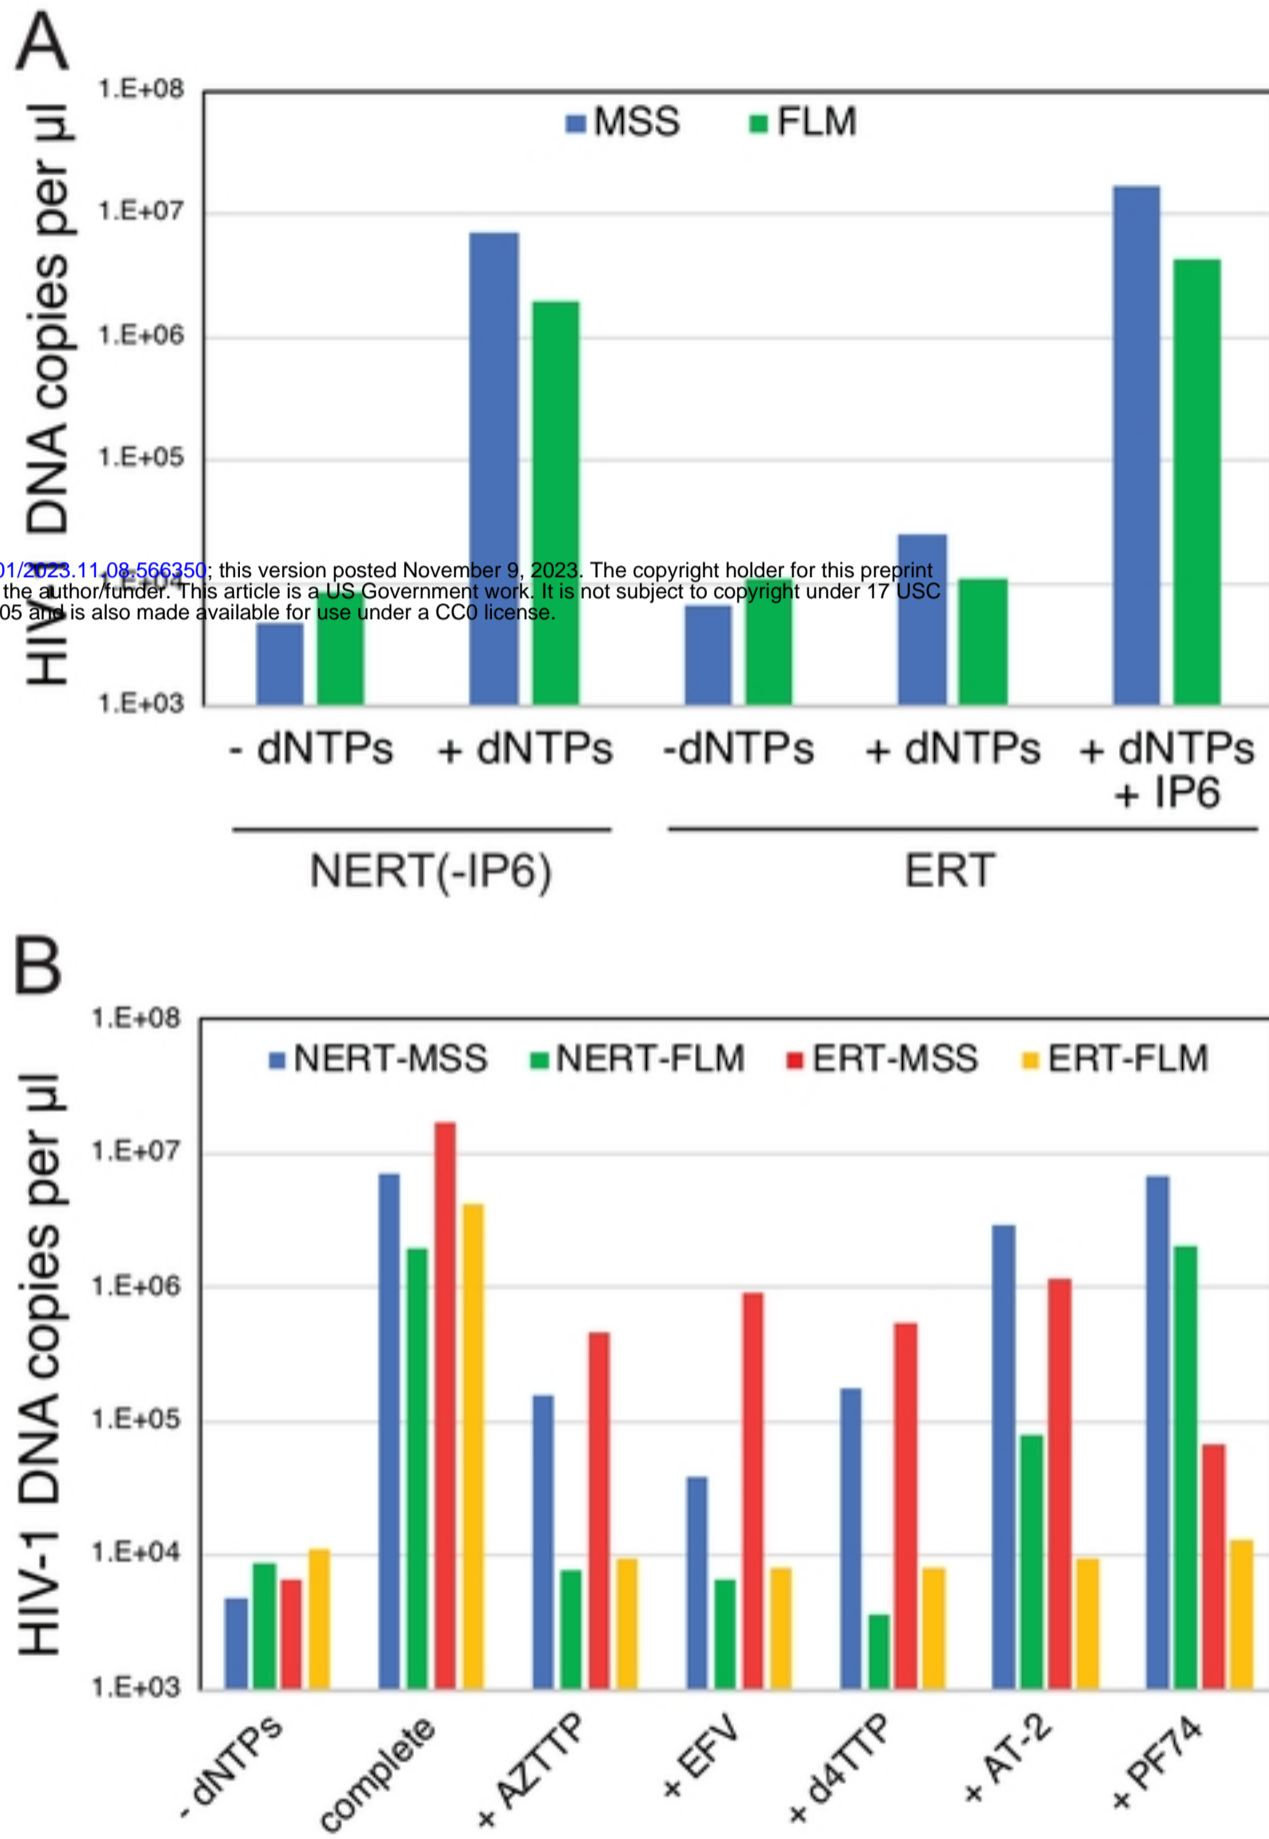

Figure 3

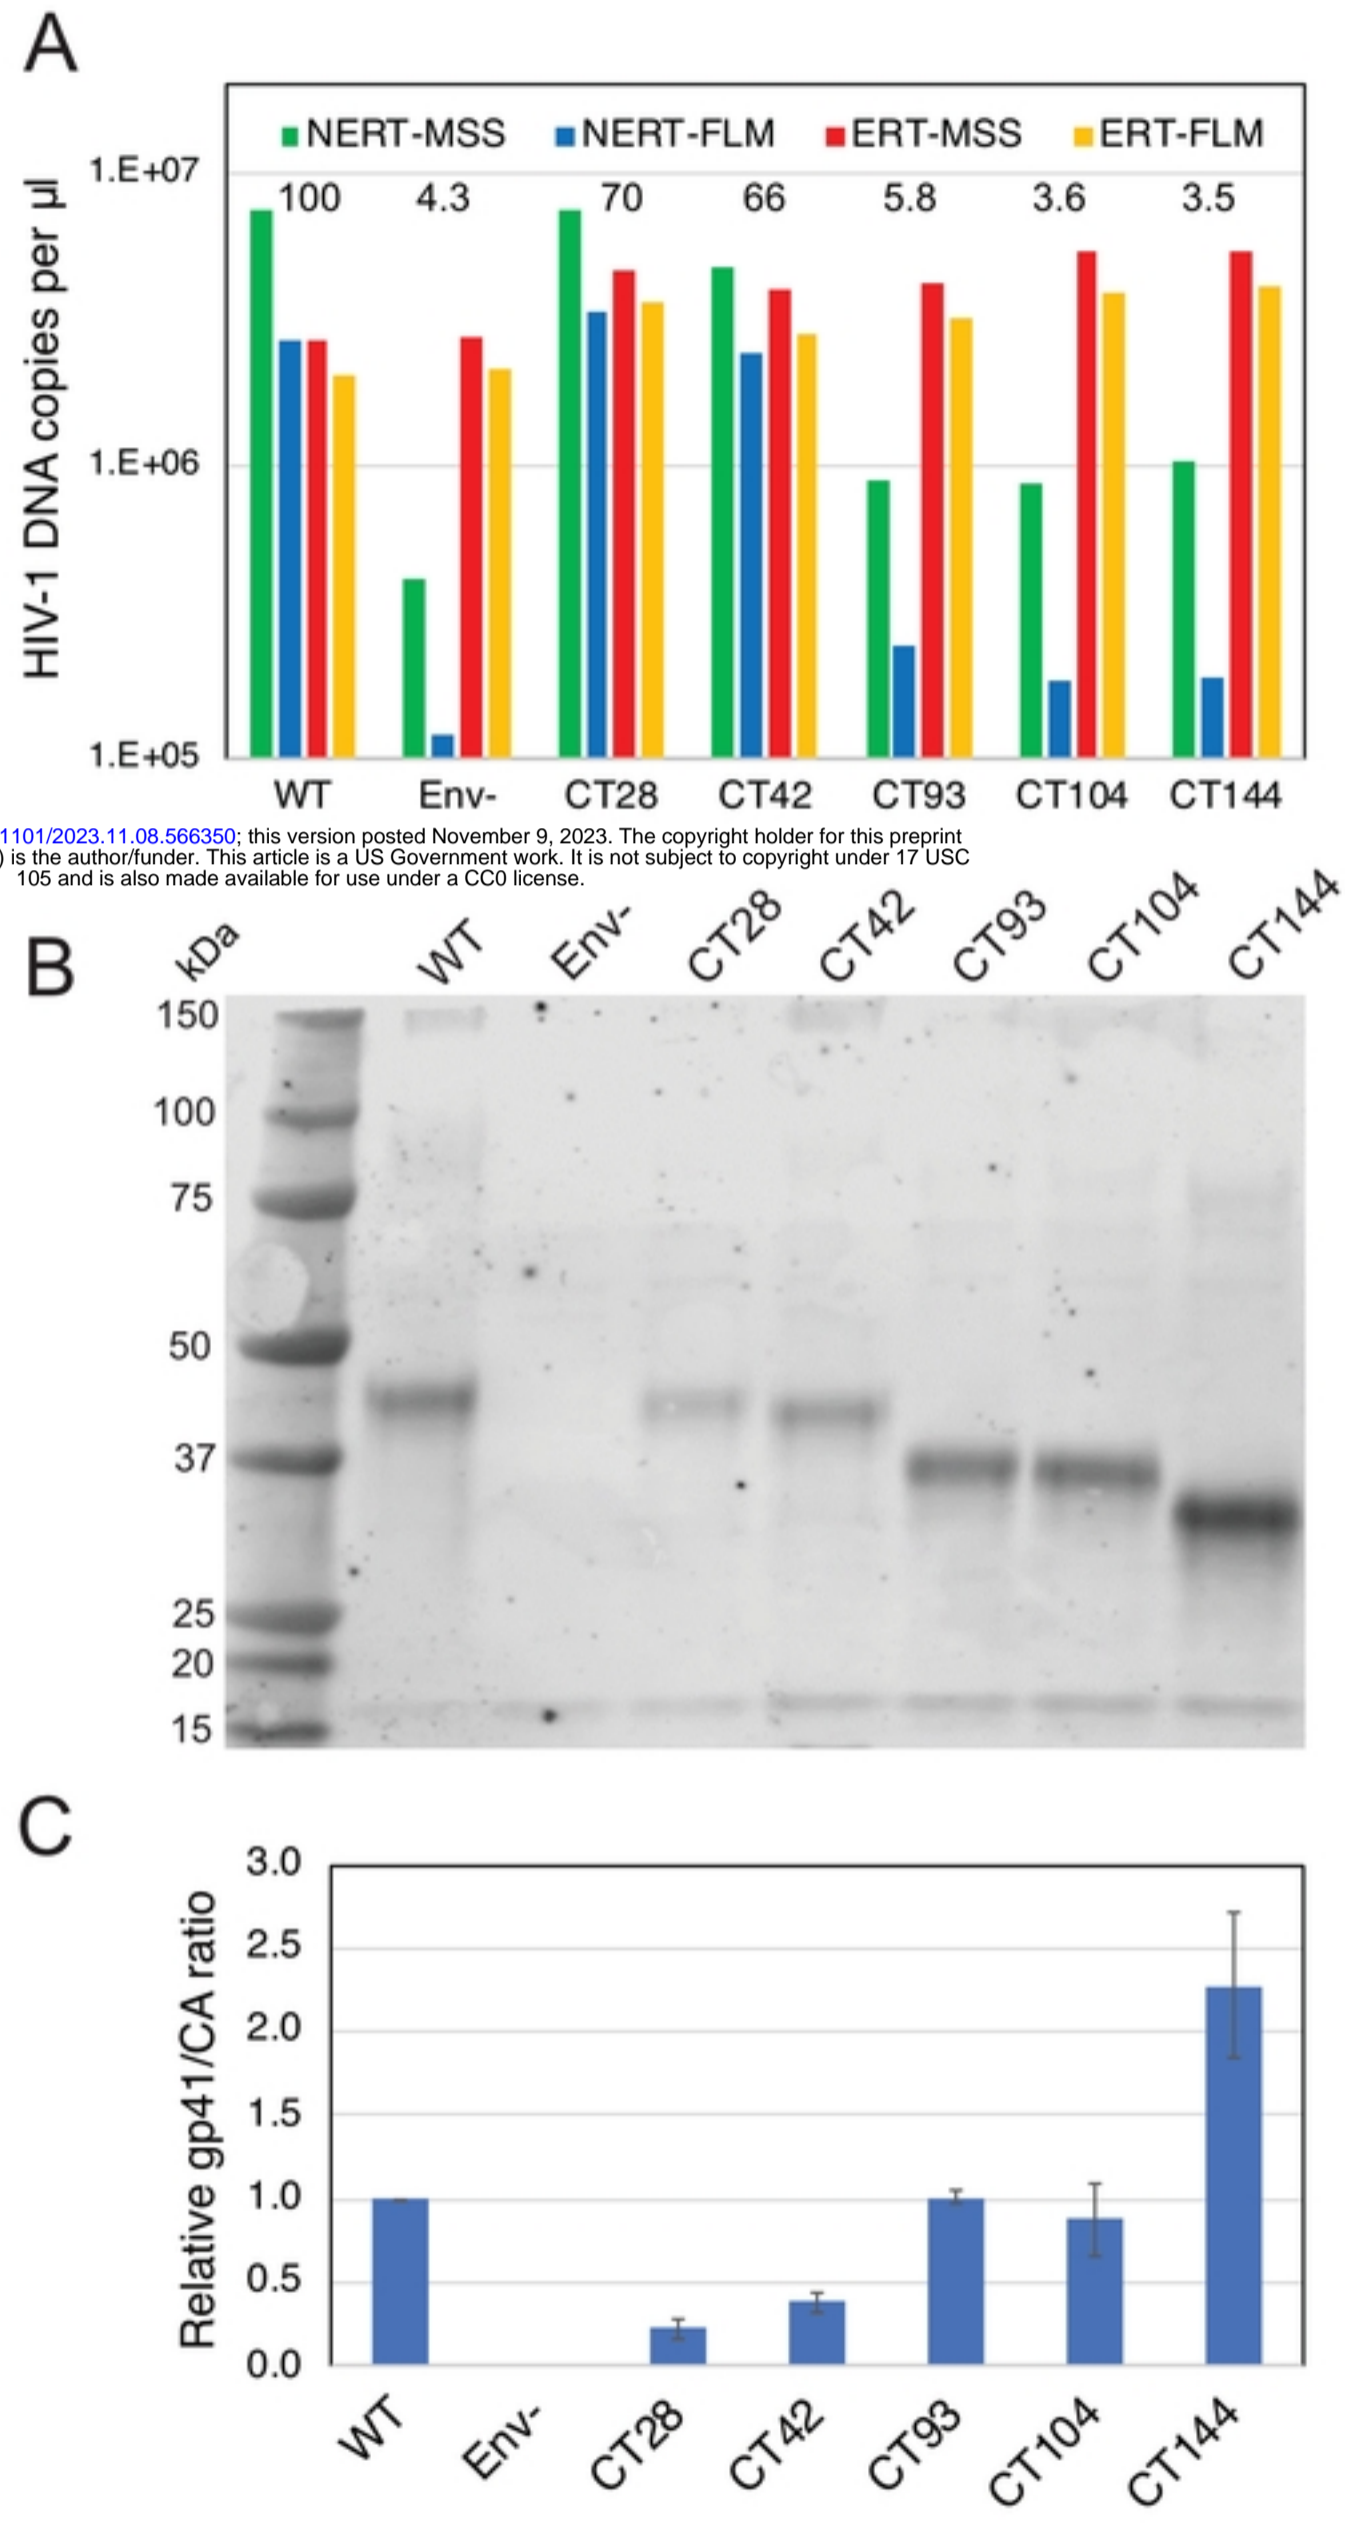

bioRxiv preprint doi: <https://doi.org/10.1101/2023.11.08.566350>; this version posted November 9, 2023. The copyright holder for this preprint (which was not certified by peer review) is the author/funder. This article is a US Government work. It is not subject to copyright under 17 USC 105 and is also made available for use under a CC0 license.

Figure 4



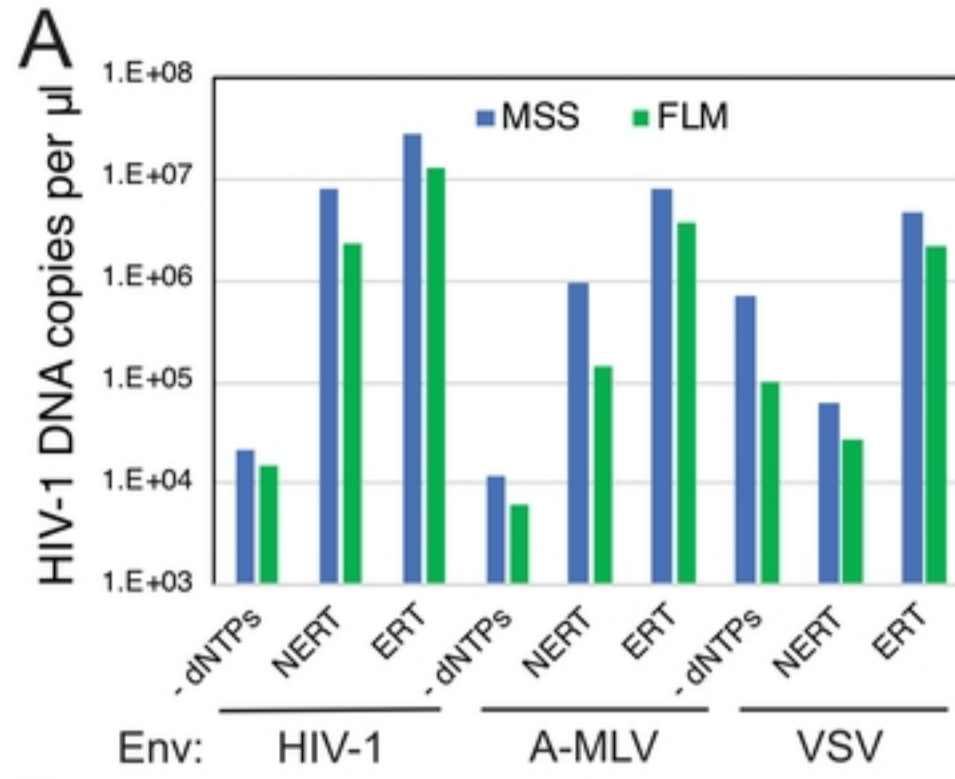

bioRxiv preprint doi: <https://doi.org/10.1101/2023.11.08.566300>; this version posted November 9, 2023. The copyright holder for this preprint (which was not certified by peer review) is the author/funder. This article is a US Government work. It is not subject to copyright under 17 USC 105 and is also made available for use under a CC0 license.

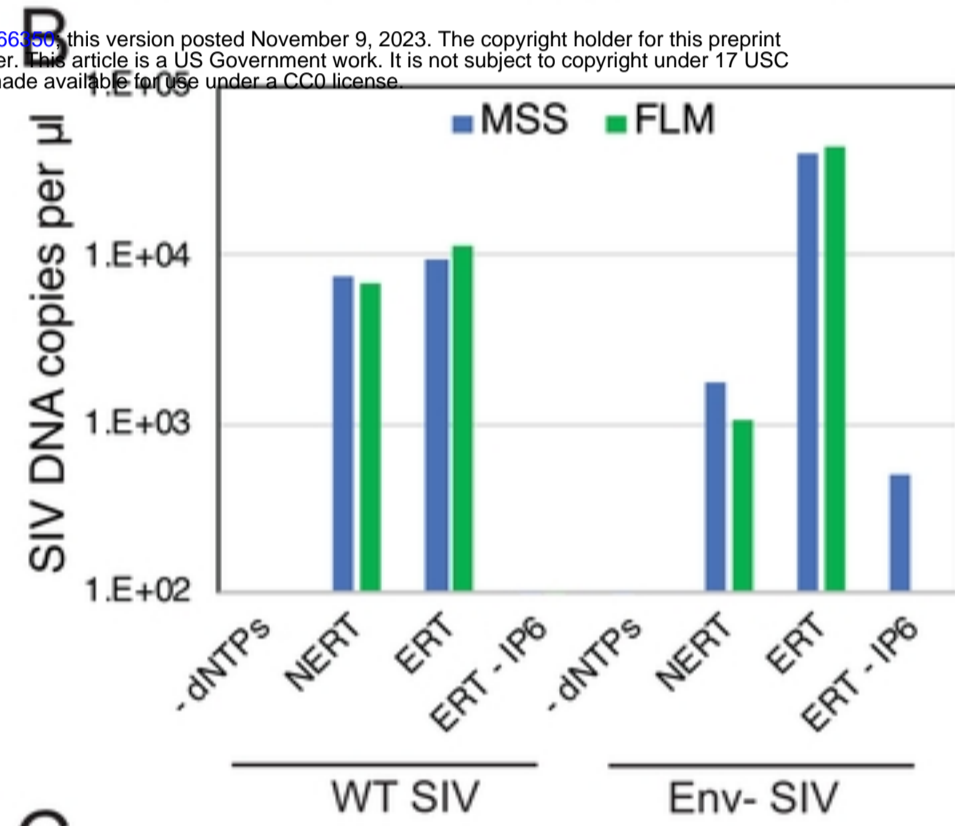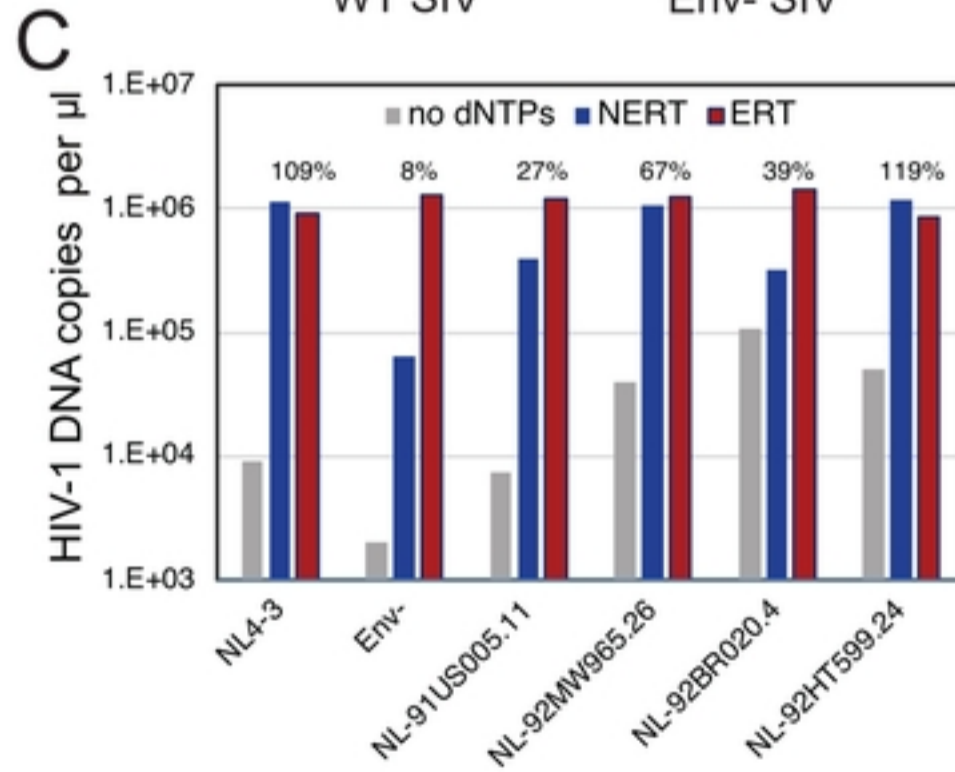

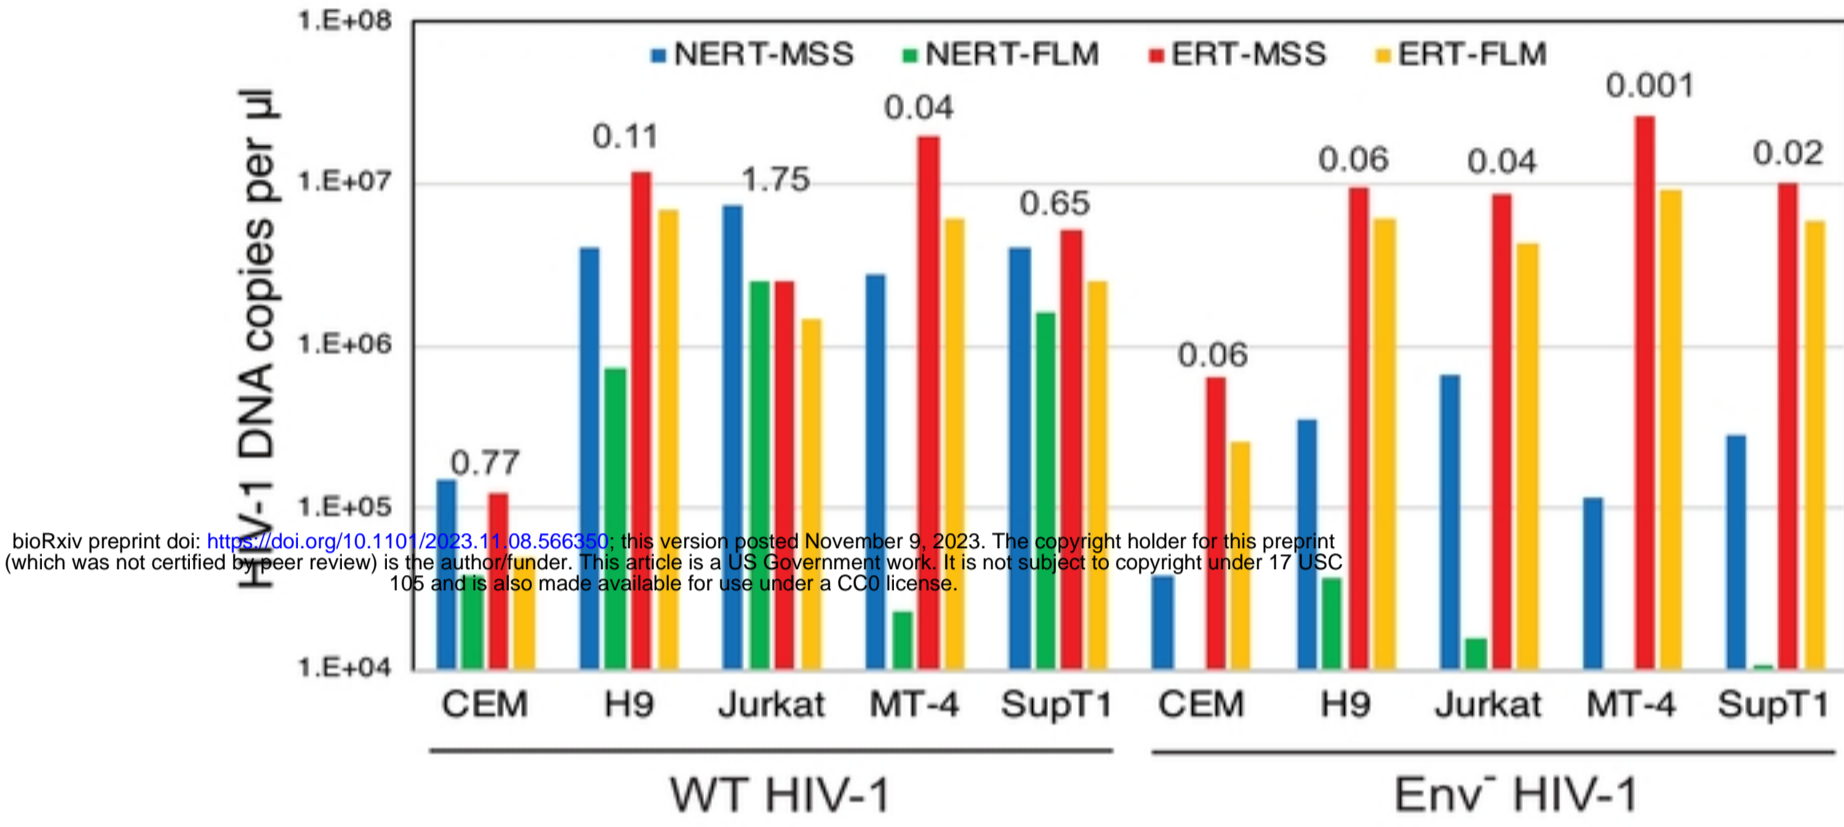



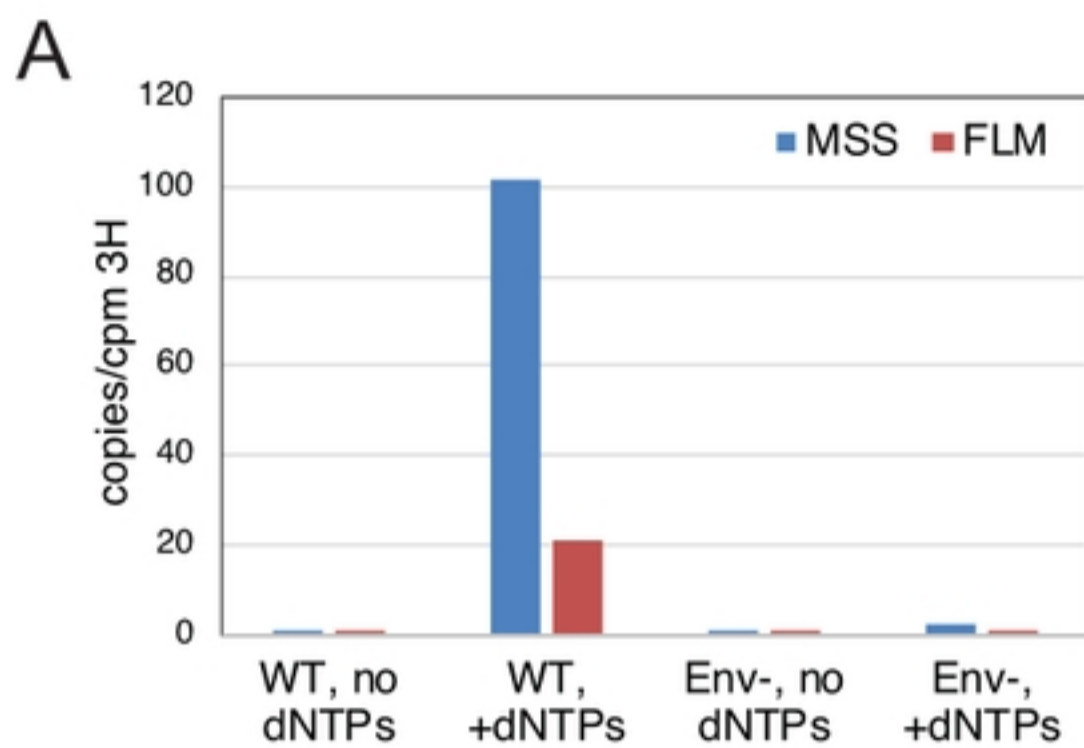

bioRxiv preprint doi: <https://doi.org/10.1101/2023.11.08.566350>; this version posted November 9, 2023. The copyright holder for this preprint (which was not certified by peer review) is the author/funder. This article is a US Government work. It is not subject to copyright under 17 USC 105 and is also made available for use under a CC0 license.

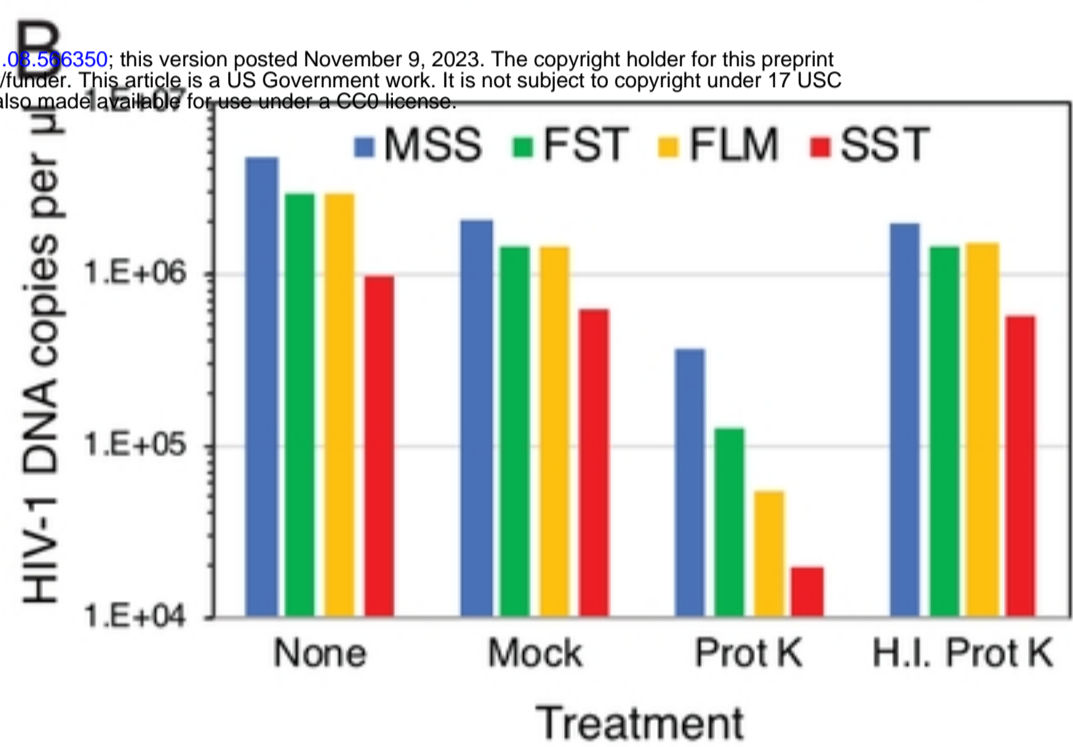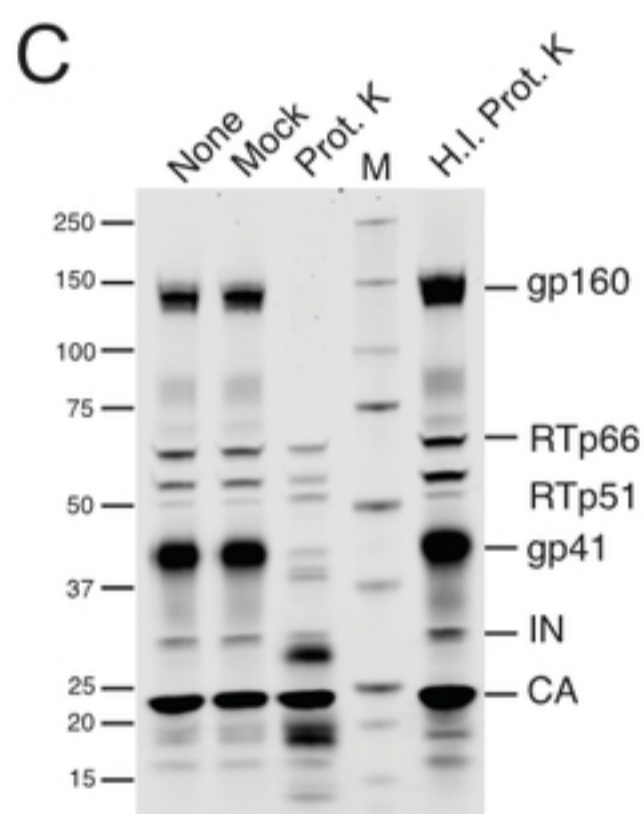

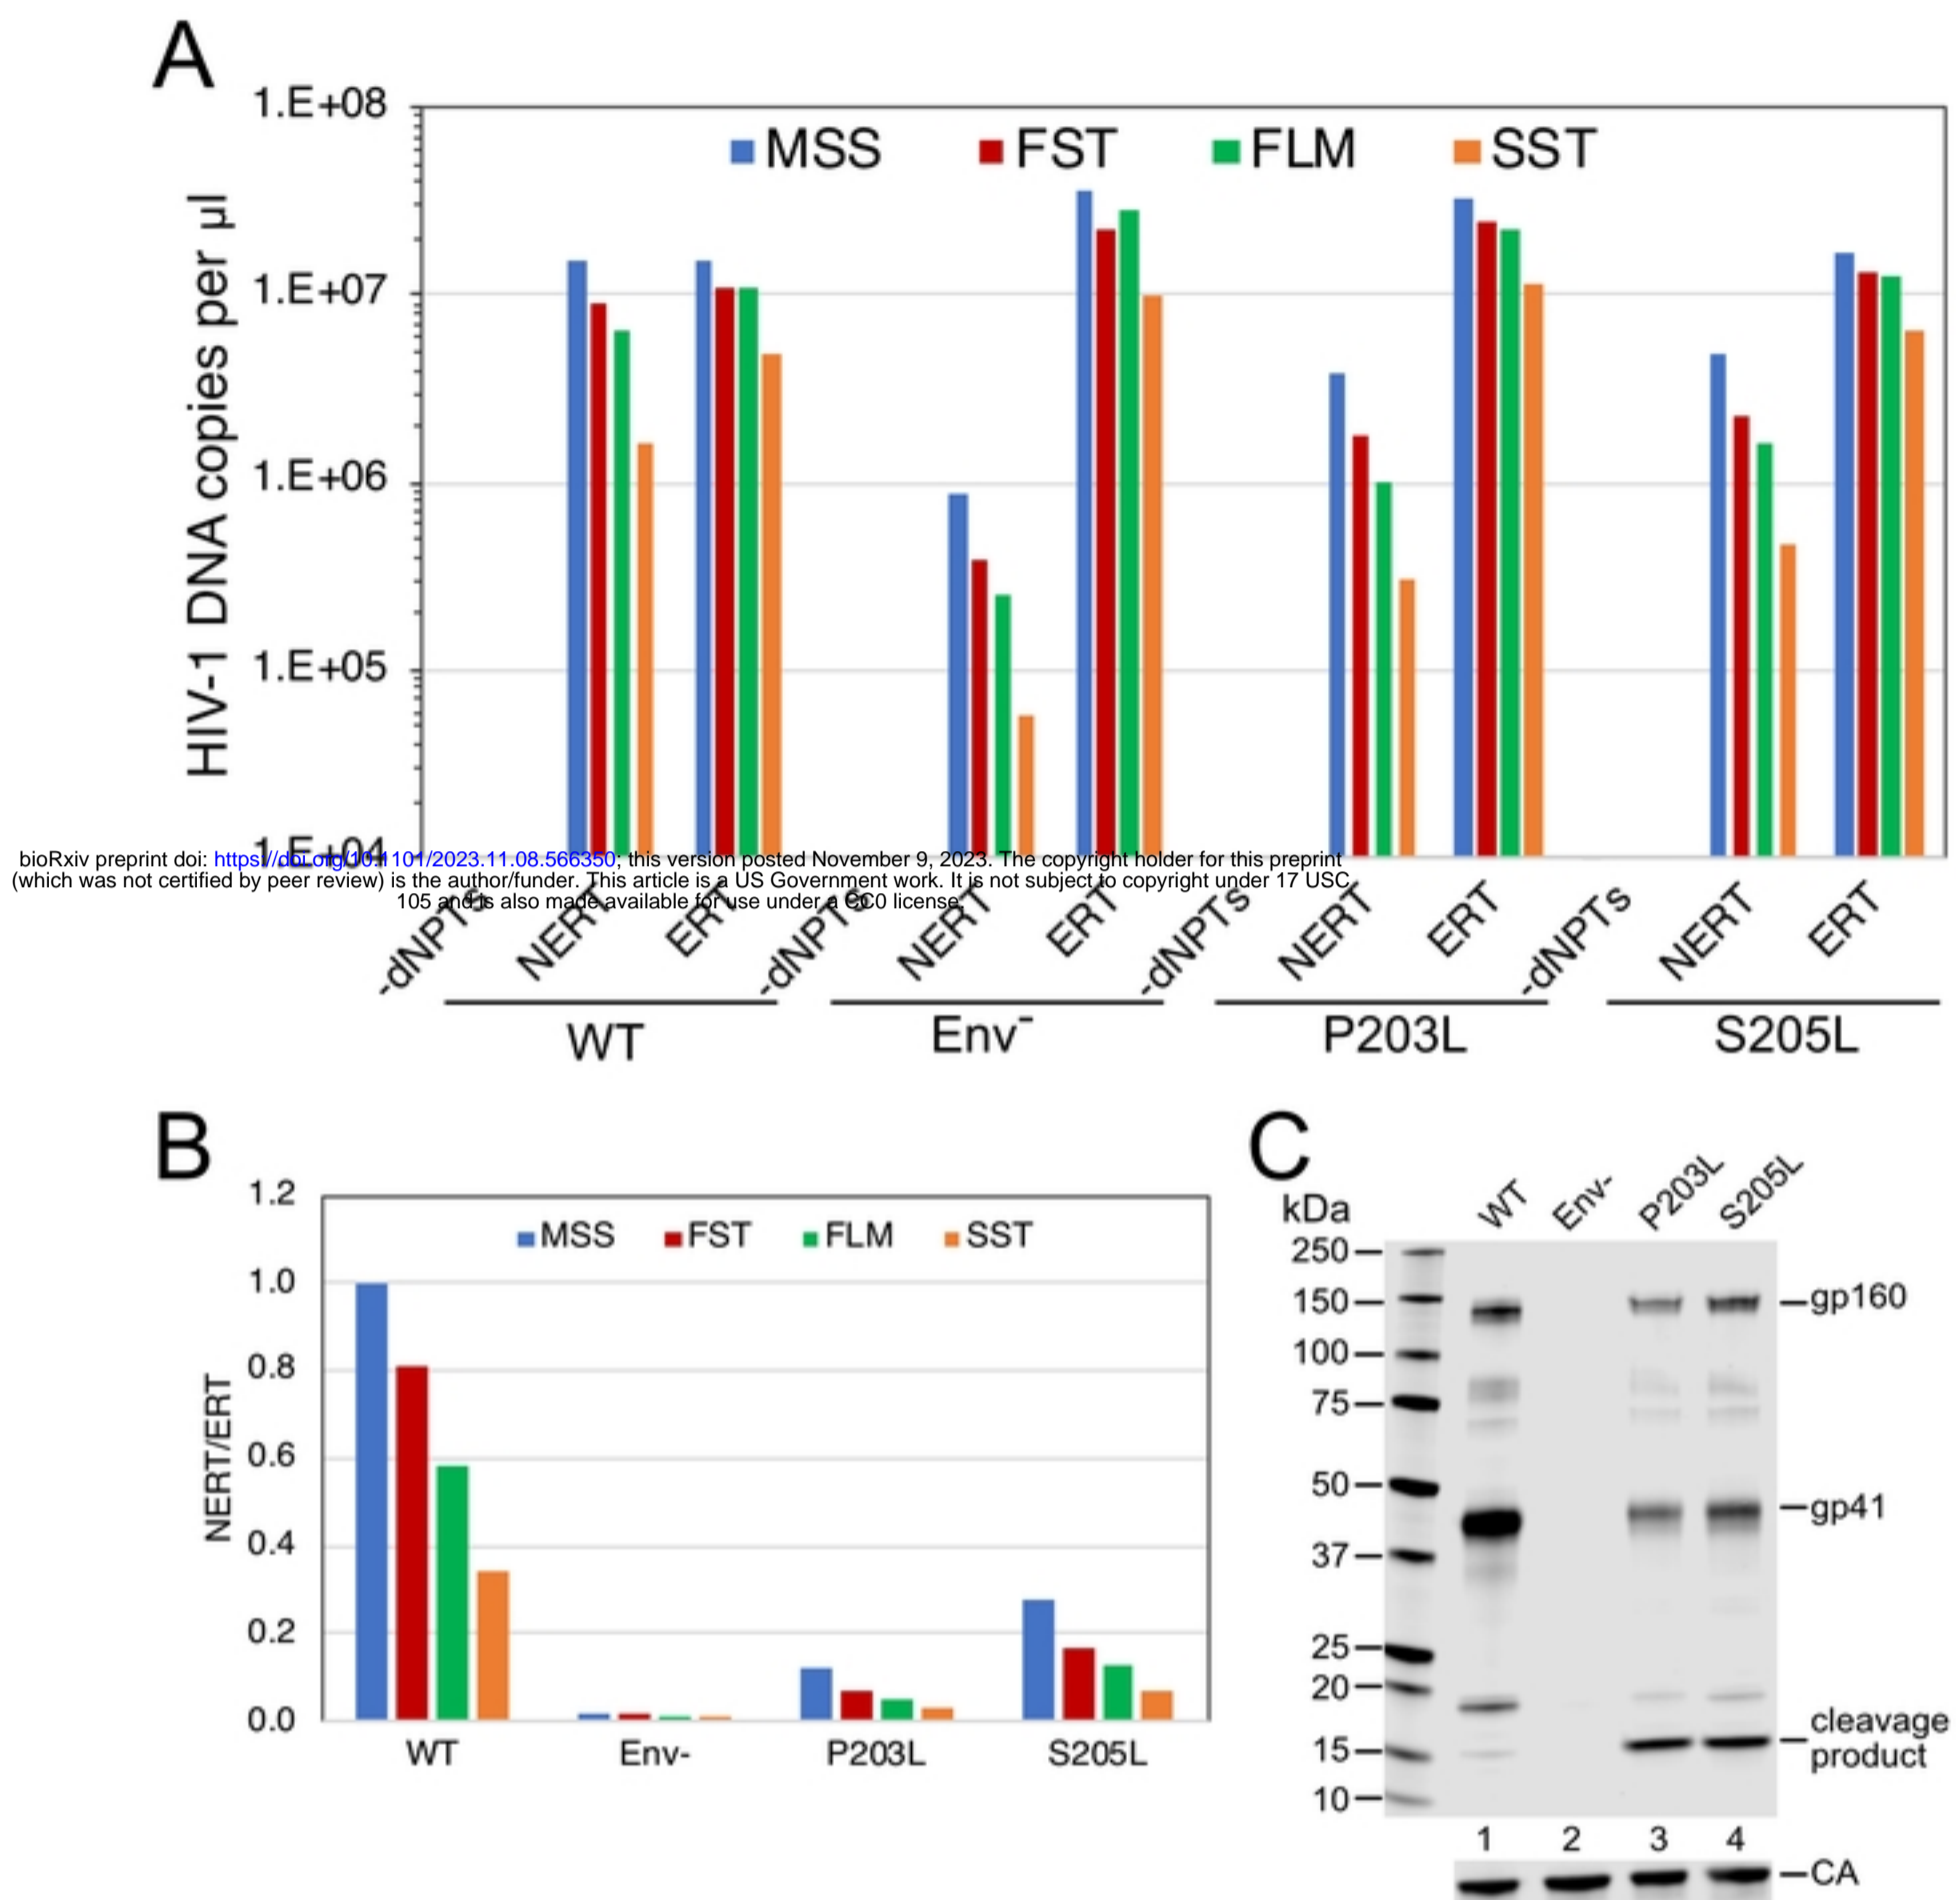

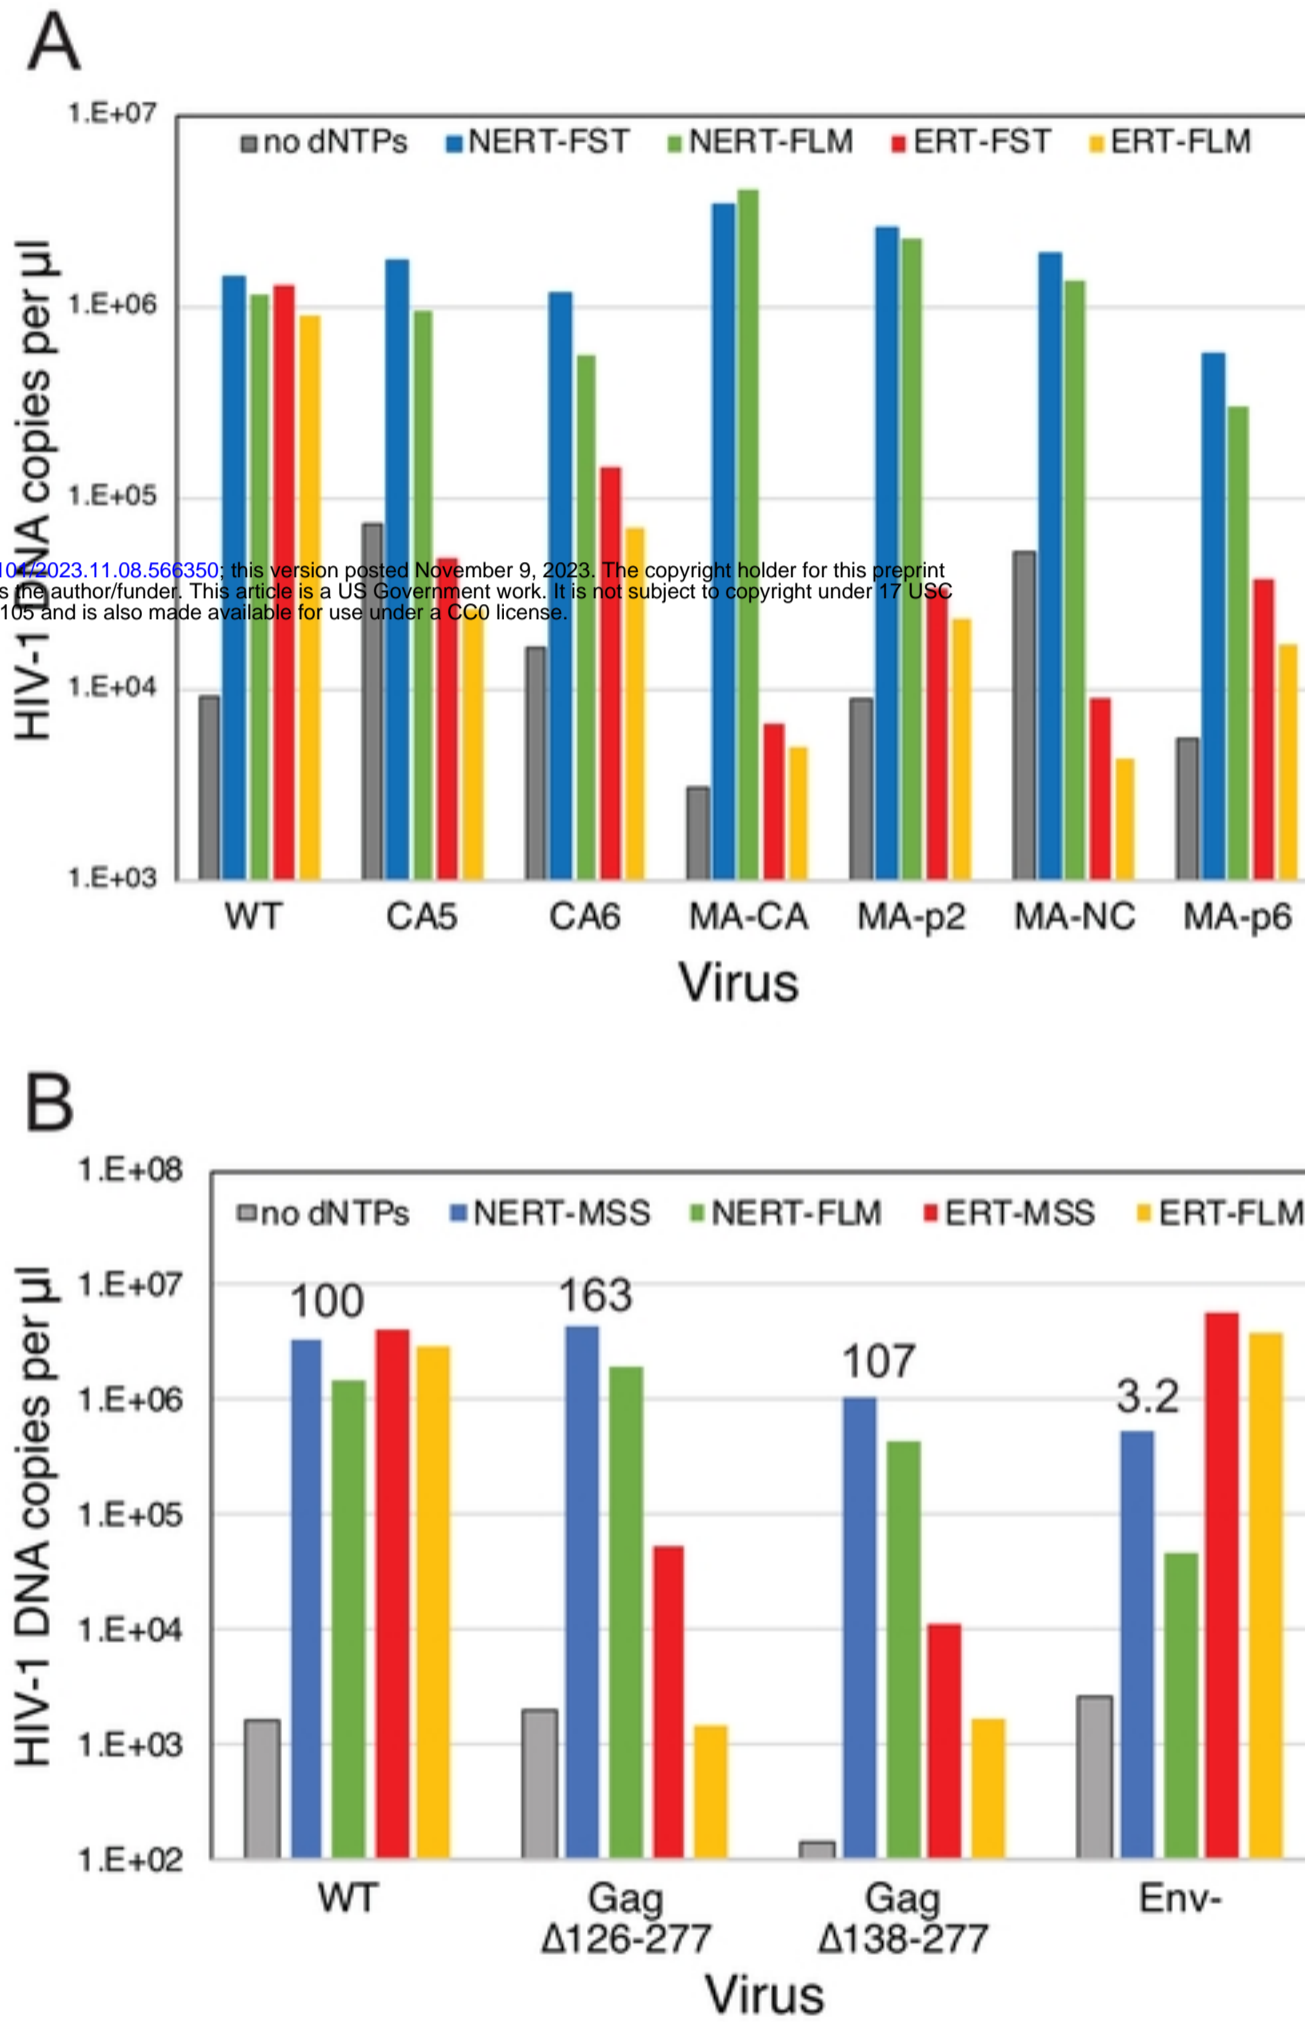

bioRxiv preprint doi: <https://doi.org/10.1101/2023.11.08.566350>; this version posted November 9, 2023. The copyright holder for this preprint (which was not certified by peer review) is the author/funder. This article is a US Government work. It is not subject to copyright under 17 USC 105 and is also made available for use under a CC0 license.
